# Supplementary material
Source: publisher figshare collection journal article supplement (https://gsajournals.figshare.com/articles/dataset/_/6626849)
Supplement: Supplementary file 1 [file 2]

## Sheet: Sheet1
Suplimentary table S5: CIS element analysis of putative LEA promoters related to drought stress
LEA type	Factor or Site Name	Loc.(St	r.)	Signal Sequence	SITE	Function
LEA 2	LTRECOREATCOR15	728	(-)	CCGAC	S000153	necessary for cold- or drought
LEA 2	CBFHV	3	(-)	RYCGAC	S000497	dehydration-responsive element
LEA 2	LTRECOREATCOR15	239	(-)	CCGAC	S000153	necessary for cold- or drought
LEA 2	MYBAT	513	(+)	TAACTG	S000177	MYB recognition site
LEA 2	ABREATCONSENSUS	436	(-)	YACGTGGC	S000406	ABA-responsive elements
LEA 2	ABRECE1HVA	673	(+)	TGCCACCGG	S000014	ABA responsive complex
LEA 2	ABRECE1HVA	673	(+)	TGCCACCGG	S000014	ABA responsive complex
LEA 2	ABRELATERD1	110	(-)	ACGTG	S000414	ABA responsive complex
LEA 2	ABRELATERD1	435	(+)	ACGTG	S000414	ABA responsive complex
LEA 2	ABRELATERD1	697	(-)	ACGTG	S000414	ABA responsive complex
LEA 2	ABRELATERD1	903	(+)	ACGTG	S000414	ABA responsive complex
LEA 2	ABRELATERD1	1006	(+)	ACGTG	S000414	ABA responsive complex
LEA 2	ACGTATERD1	194	(+)	ACGT	S000415	early responsive to dehydration
LEA 2	ACGTATERD1	200	(-)	ACGT	S000415	early responsive to dehydration
LEA 2	ACGTATERD1	200	(+)	ACGT	S000415	early responsive to dehydration
LEA 2	ACGTATERD1	849	(-)	ACGT	S000415	early responsive to dehydration
LEA 2	ACGTATERD1	849	(+)	ACGT	S000415	early responsive to dehydration
LEA 2	ASF1MOTIFCAMV	634	(-)	TGACG	S000024	Abiotic and biotic stress
LEA 2	ASF1MOTIFCAMV	110	(+)	TGACG	S000024	Abiotic and biotic stress
LEA 2	ASF1MOTIFCAMV	125	(+)	TGACG	S000024	Abiotic and biotic stress
LEA 2	ASF1MOTIFCAMV	140	(-)	TGACG	S000024	Abiotic and biotic stress
LEA 2	ASF1MOTIFCAMV	462	(+)	TGACG	S000024	Abiotic and biotic stress
LEA 2	ASF1MOTIFCAMV	199	(-)	TGACG	S000024	Abiotic and biotic stress
LEA 2	ASF1MOTIFCAMV	229	(+)	TGACG	S000024	Abiotic and biotic stress
LEA 2	LTRECOREATCOR15	3	(-)	CCGAC	S000153	necessary for cold- or drought
LEA 2	LTRECOREATCOR15	449	(-)	CCGAC	S000153	necessary for cold- or drought
LEA 2	LTRECOREATCOR15	424	(+)	CCGAC	S000153	necessary for cold- or drought
LEA 2	LTRECOREATCOR15	630	(-)	CCGAC	S000153	necessary for cold- or drought
LEA 2	LTRECOREATCOR15	269	(-)	CCGAC	S000153	necessary for cold- or drought
LEA 2	LTRECOREATCOR15	350	(+)	CCGAC	S000153	necessary for cold- or drought
LEA 2	LTRECOREATCOR15	500	(+)	CCGAC	S000153	necessary for cold- or drought
LEA 2	LTRECOREATCOR15	849	(+)	CCGAC	S000153	necessary for cold- or drought
LEA 2	LTRECOREATCOR15	565	(-)	CCGAC	S000153	necessary for cold- or drought
LEA 2	LTRECOREATCOR15	175	(-)	CCGAC	S000153	necessary for cold- or drought
LEA 2	LTRECOREATCOR15	294	(-)	CCGAC	S000153	necessary for cold- or drought
LEA 2	LTRECOREATCOR15	335	(-)	CCGAC	S000153	necessary for cold- or drought
LEA 2	LTRECOREATCOR15	537	(-)	CCGAC	S000153	necessary for cold- or drought
LEA 2	MYBAT	727	(+)	TAACTG	S000177	MYB recognition site
LEA 2	MYBAT	724	(-)	TAACTG	S000177	MYB recognition site
LEA 2	MYBAT	513	(+)	TAACTG	S000177	MYB recognition site
LEA 2	MYBAT	681	(+)	TAACTG	S000177	MYB recognition site
LEA 2	MYBAT	939	(-)	TAACTG	S000177	MYB recognition site
LEA 2	MYBAT	525	(-)	TAACTG	S000177	MYB recognition site
LEA 2	MYBAT	372	(-)	TAACTG	S000177	MYB recognition site
LEA 2	MYBAT	740	(-)	TAACTG	S000177	MYB recognition site
LEA 2	MYBAT	376	(-)	TAACTG	S000177	MYB recognition site
LEA 2	MYBAT	513	(+)	TAACTG	S000177	MYB recognition site
LEA 2	MYBAT	724	(-)	TAACTG	S000177	MYB recognition site
LEA 2	MYBAT	514	(-)	TAACTG	S000177	MYB recognition site
LEA 2	MYBAT	727	(+)	TAACTG	S000177	MYB recognition site
LEA 2	MYBAT	526	(-)	TAACTG	S000177	MYB recognition site
LEA 2	MYBAT	529	(+)	TAACTG	S000177	MYB recognition site
LEA 2	MYBAT	1315	(-)	TAACTG	S000177	MYB recognition site
LEA 2	MYBAT	185	(+)	TAACTG	S000177	MYB recognition site
LEA 2	MYBAT	372	(-)	TAACTG	S000177	MYB recognition site
LEA 2	MYBAT	372	(-)	TAACTG	S000177	MYB recognition site
LEA 2	MYBAT	740	(-)	TAACTG	S000177	MYB recognition site
LEA 2	MYBATRD	60	(+)	CTAACCA	S000175	MYB recognition site
LEA 2	MYBATRD	193	(+)	CTAACCA	S000175	MYB recognition site
LEA 2	MYBATRD	60	(+)	CTAACCA	S000175	MYB recognition site
LEA 2	MYBATRD	60	(+)	CTAACCA	S000175	MYB recognition site
LEA 2	MYBATRD	123	(-)	CTAACCA	S000175	MYB recognition site
LEA 2	MYBATRD	193	(+)	CTAACCA	S000175	MYB recognition site
LEA 2	MYBATRD	207	(+)	CTAACCA	S000175	MYB recognition site
LEA 2	ABRELATERD1	248	(-)	ACGTG	S000414	ABA responsive complex
LEA 2	LTRECOREATCOR15	11	(+)	CCGAC	S000153	necessary for cold- or drought
LEA 2	LTRECOREATCOR15	588	(-)	CCGAC	S000153	necessary for cold- or drought
LEA 2	LTRECOREATCOR15	273	(-)	CCGAC	S000153	necessary for cold- or drought
LEA 2	LTRECOREATCOR15	296	(+)	CCGAC	S000153	necessary for cold- or drought
LEA 2	MYBATRD	1480	(+)	CTAACCA	S000175	MYB recognition site
LEA 2	MYBATRD	53	(+)	CTAACCA	S000175	MYB recognition site
LEA 2	MYBATRD	574	(-)	CTAACCA	S000175	MYB recognition site
LEA 2	MYBATRD	53	(+)	CTAACCA	S000175	MYB recognition site
LEA 2	MYBATRD	53	(+)	CTAACCA	S000175	MYB recognition site
LEA 2	ABRELATERD1	580	(+)	ACGTG	S000414	ABA responsive complex
LEA 2	CBFHV	449	(-)	RYCGAC	S000497	dehydration-responsive element
LEA 2	CBFHV	227	(+)	RYCGAC	S000497	dehydration-responsive element
LEA 2	CBFHV	270	(+)	RYCGAC	S000497	dehydration-responsive element
LEA 2	CBFHV	52	(-)	RYCGAC	S000497	dehydration-responsive element
LEA 2	LTRECOREATCOR15	3	(-)	CCGAC	S000153	necessary for cold- or drought
LEA 2	LTRECOREATCOR15	411	(-)	CCGAC	S000153	necessary for cold- or drought
LEA 2	LTRECOREATCOR15	802	(+)	CCGAC	S000153	necessary for cold- or drought
LEA 2	LTRECOREATCOR15	313	(+)	CCGAC	S000153	necessary for cold- or drought
LEA 2	LTRECOREATCOR15	225	(-)	CCGAC	S000153	necessary for cold- or drought
LEA 2	LTRECOREATCOR15	3	(-)	CCGAC	S000153	necessary for cold- or drought
LEA 2	LTRECOREATCOR15	588	(-)	CCGAC	S000153	necessary for cold- or drought
LEA 2	LTRECOREATCOR15	535	(-)	CCGAC	S000153	necessary for cold- or drought
LEA 2	MYBCONSENSUSAT	61	(+)	YAACKG	S000409	MYB recognition site
LEA 2	MYBCONSENSUSAT	501	(+)	YAACKG	S000409	MYB recognition site
LEA 2	MYBCONSENSUSAT	632	(-)	YAACKG	S000409	MYB recognition site
LEA 2	MYBCONSENSUSAT	646	(-)	YAACKG	S000409	MYB recognition site
LEA 2	MYBCONSENSUSAT	149	(+)	YAACKG	S000409	MYB recognition site
LEA 2	MYBCONSENSUSAT	387	(+)	YAACKG	S000409	MYB recognition site
LEA 2	MYBCONSENSUSAT	588	(-)	YAACKG	S000409	MYB recognition site
LEA 2	MYBCONSENSUSAT	605	(+)	YAACKG	S000409	MYB recognition site
LEA 2	MYBCONSENSUSAT	626	(-)	YAACKG	S000409	MYB recognition site
LEA 2	LTRECOREATCOR15	3	(-)	CCGAC	S000153	necessary for cold- or drought
LEA 2	LTRECOREATCOR15	130	(+)	CCGAC	S000153	necessary for cold- or drought
LEA 2	ABRELATERD1	409	(+)	ACGTG	S000414	ABA responsive complex
LEA 2	LTRECOREATCOR15	513	(-)	CCGAC	S000153	necessary for cold- or drought
LEA 2	LTRECOREATCOR15	3	(-)	CCGAC	S000153	necessary for cold- or drought
LEA 2	MYBCONSENSUSAT	688	(-)	YAACKG	S000409	MYB recognition site
LEA 2	MYBCONSENSUSAT	525	(-)	YAACKG	S000409	MYB recognition site
LEA 2	ACGTATERD1	97	(-)	ACGT	S000415	early responsive to dehydration
LEA 2	ACGTATERD1	97	(+)	ACGT	S000415	early responsive to dehydration
LEA 2	ACGTATERD1	370	(-)	ACGT	S000415	early responsive to dehydration
LEA 2	ACGTATERD1	370	(+)	ACGT	S000415	early responsive to dehydration
LEA 2	ACGTATERD1	913	(-)	ACGT	S000415	early responsive to dehydration
LEA 2	ACGTATERD1	913	(+)	ACGT	S000415	early responsive to dehydration
LEA 2	ACGTATERD1	552	(-)	ACGT	S000415	early responsive to dehydration
LEA 2	ACGTATERD1	552	(+)	ACGT	S000415	early responsive to dehydration
LEA 2	AGCBOXNPGLB	426	(+)	AGCCGCC	S000232	stress signal-response factors
LEA 2	AGCBOXNPGLB	205	(+)	AGCCGCC	S000232	stress signal-response factors
LEA 2	AGCBOXNPGLB	27	(+)	AGCCGCC	S000232	stress signal-response factors
LEA 2	AGCBOXNPGLB	525	(-)	AGCCGCC	S000232	stress signal-response factors
LEA 2	AGCBOXNPGLB	17	(+)	AGCCGCC	S000232	stress signal-response factors
LEA 2	AGCBOXNPGLB	226	(+)	AGCCGCC	S000232	stress signal-response factors
LEA 2	AGCBOXNPGLB	205	(+)	AGCCGCC	S000232	stress signal-response factors
LEA 2	AGCBOXNPGLB	205	(+)	AGCCGCC	S000232	stress signal-response factors
LEA 2	AGCBOXNPGLB	525	(-)	AGCCGCC	S000232	stress signal-response factors
LEA 2	AGMOTIFNTMYB	525	(+)	AGATCCAA	S000444	induced by various stress
LEA 2	AGMOTIFNTMYB	600	(-)	AGATCCAA	S000444	induced by various stress
LEA 2	AGMOTIFNTMYB	525	(+)	AGATCCAA	S000444	induced by various stress
LEA 2	ASF1MOTIFCAMV	630	(-)	TGACG	S000024	Abiotic and biotic stress
LEA 2	ASF1MOTIFCAMV	267	(-)	TGACG	S000024	Abiotic and biotic stress
LEA 2	ASF1MOTIFCAMV	697	(-)	TGACG	S000024	Abiotic and biotic stress
LEA 2	ASF1MOTIFCAMV	361	(+)	TGACG	S000024	Abiotic and biotic stress
LEA 2	ASF1MOTIFCAMV	1027	(+)	TGACG	S000024	Abiotic and biotic stress
LEA 2	ASF1MOTIFCAMV	241	(+)	TGACG	S000024	Abiotic and biotic stress
LEA 2	ASF1MOTIFCAMV	143	(-)	TGACG	S000024	Abiotic and biotic stress
LEA 2	ASF1MOTIFCAMV	189	(-)	TGACG	S000024	Abiotic and biotic stress
LEA 2	ASF1MOTIFCAMV	214	(-)	TGACG	S000024	Abiotic and biotic stress
LEA 2	ASF1MOTIFCAMV	136	(+)	TGACG	S000024	Abiotic and biotic stress
LEA 2	ASF1MOTIFCAMV	55	(-)	TGACG	S000024	Abiotic and biotic stress
LEA 2	ASF1MOTIFCAMV	664	(-)	TGACG	S000024	Abiotic and biotic stress
LEA 2	ASF1MOTIFCAMV	440	(+)	TGACG	S000024	Abiotic and biotic stress
LEA 2	ASF1MOTIFCAMV	586	(+)	TGACG	S000024	Abiotic and biotic stress
LEA 2	ASF1MOTIFCAMV	614	(+)	TGACG	S000024	Abiotic and biotic stress
LEA 2	ASF1MOTIFCAMV	565	(+)	TGACG	S000024	Abiotic and biotic stress
LEA 2	ASF1MOTIFCAMV	197	(-)	TGACG	S000024	Abiotic and biotic stress
LEA 2	ASF1MOTIFCAMV	617	(+)	TGACG	S000024	Abiotic and biotic stress
LEA 2	ASF1MOTIFCAMV	351	(-)	TGACG	S000024	Abiotic and biotic stress
LEA 2	ASF1MOTIFCAMV	283	(-)	TGACG	S000024	Abiotic and biotic stress
LEA 2	ASF1MOTIFCAMV	911	(+)	TGACG	S000024	Abiotic and biotic stress
LEA 2	ASF1MOTIFCAMV	41	(-)	TGACG	S000024	Abiotic and biotic stress
LEA 2	ASF1MOTIFCAMV	104	(+)	TGACG	S000024	Abiotic and biotic stress
LEA 2	ASF1MOTIFCAMV	284	(+)	TGACG	S000024	Abiotic and biotic stress
LEA 2	ASF1MOTIFCAMV	687	(+)	TGACG	S000024	Abiotic and biotic stress
LEA 2	ASF1MOTIFCAMV	24	(-)	TGACG	S000024	Abiotic and biotic stress
LEA 2	ASF1MOTIFCAMV	33	(-)	TGACG	S000024	Abiotic and biotic stress
LEA 2	ASF1MOTIFCAMV	79	(+)	TGACG	S000024	Abiotic and biotic stress
LEA 2	ASF1MOTIFCAMV	195	(-)	TGACG	S000024	Abiotic and biotic stress
LEA 2	ASF1MOTIFCAMV	311	(-)	TGACG	S000024	Abiotic and biotic stress
LEA 2	ASF1MOTIFCAMV	348	(-)	TGACG	S000024	Abiotic and biotic stress
LEA 2	ASF1MOTIFCAMV	324	(+)	TGACG	S000024	Abiotic and biotic stress
LEA 2	ASF1MOTIFCAMV	30	(+)	TGACG	S000024	Abiotic and biotic stress
LEA 2	ASF1MOTIFCAMV	627	(+)	TGACG	S000024	Abiotic and biotic stress
LEA 2	ASF1MOTIFCAMV	363	(+)	TGACG	S000024	Abiotic and biotic stress
LEA 2	ASF1MOTIFCAMV	494	(+)	TGACG	S000024	Abiotic and biotic stress
LEA 2	ASF1MOTIFCAMV	605	(-)	TGACG	S000024	Abiotic and biotic stress
LEA 2	ASF1MOTIFCAMV	41	(-)	TGACG	S000024	Abiotic and biotic stress
LEA 2	ASF1MOTIFCAMV	104	(+)	TGACG	S000024	Abiotic and biotic stress
LEA 2	ASF1MOTIFCAMV	284	(+)	TGACG	S000024	Abiotic and biotic stress
LEA 2	ASF1MOTIFCAMV	687	(+)	TGACG	S000024	Abiotic and biotic stress
LEA 2	ASF1MOTIFCAMV	162	(-)	TGACG	S000024	Abiotic and biotic stress
LEA 2	ASF1MOTIFCAMV	159	(-)	TGACG	S000024	Abiotic and biotic stress
LEA 2	ASF1MOTIFCAMV	208	(-)	TGACG	S000024	Abiotic and biotic stress
LEA 2	ASF1MOTIFCAMV	244	(-)	TGACG	S000024	Abiotic and biotic stress
LEA 2	ASF1MOTIFCAMV	72	(-)	TGACG	S000024	Abiotic and biotic stress
LEA 2	ASF1MOTIFCAMV	671	(-)	TGACG	S000024	Abiotic and biotic stress
LEA 2	ASF1MOTIFCAMV	193	(-)	TGACG	S000024	Abiotic and biotic stress
LEA 2	CBFHV	324	(+)	RYCGAC	S000497	dehydration-responsive element
LEA 2	CBFHV	175	(-)	RYCGAC	S000497	dehydration-responsive element
LEA 2	CBFHV	270	(+)	RYCGAC	S000497	dehydration-responsive element
LEA 2	CBFHV	410	(+)	RYCGAC	S000497	dehydration-responsive element
LEA 2	CBFHV	3	(-)	RYCGAC	S000497	dehydration-responsive element
LEA 2	CBFHV	449	(-)	RYCGAC	S000497	dehydration-responsive element
LEA 2	CBFHV	423	(+)	RYCGAC	S000497	dehydration-responsive element
LEA 2	CBFHV	630	(-)	RYCGAC	S000497	dehydration-responsive element
LEA 2	CBFHV	598	(-)	RYCGAC	S000497	dehydration-responsive element
LEA 2	CBFHV	349	(+)	RYCGAC	S000497	dehydration-responsive element
LEA 2	CBFHV	848	(+)	RYCGAC	S000497	dehydration-responsive element
LEA 2	CBFHV	1007	(+)	RYCGAC	S000497	dehydration-responsive element
LEA 2	CBFHV	565	(-)	RYCGAC	S000497	dehydration-responsive element
LEA 2	CBFHV	75	(-)	RYCGAC	S000497	dehydration-responsive element
LEA 2	CBFHV	75	(+)	RYCGAC	S000497	dehydration-responsive element
LEA 2	CBFHV	274	(-)	RYCGAC	S000497	dehydration-responsive element
LEA 2	CBFHV	274	(+)	RYCGAC	S000497	dehydration-responsive element
LEA 2	CBFHV	175	(-)	RYCGAC	S000497	dehydration-responsive element
LEA 2	LTRECOREATCOR15	553	(-)	CCGAC	S000153	necessary for cold- or drought
LEA 2	LTRECOREATCOR15	29	(-)	CCGAC	S000153	necessary for cold- or drought
LEA 2	LTRECOREATCOR15	418	(-)	CCGAC	S000153	necessary for cold- or drought
LEA 2	LTRECOREATCOR15	5	(+)	CCGAC	S000153	necessary for cold- or drought
LEA 2	LTRECOREATCOR15	295	(+)	CCGAC	S000153	necessary for cold- or drought
LEA 2	LTRECOREATCOR15	401	(-)	CCGAC	S000153	necessary for cold- or drought
LEA 2	LTRECOREATCOR15	225	(+)	CCGAC	S000153	necessary for cold- or drought
LEA 2	LTRECOREATCOR15	231	(+)	CCGAC	S000153	necessary for cold- or drought
LEA 2	LTRECOREATCOR15	15	(-)	CCGAC	S000153	necessary for cold- or drought
LEA 2	LTRECOREATCOR15	210	(-)	CCGAC	S000153	necessary for cold- or drought
LEA 2	LTRECOREATCOR15	821	(-)	CCGAC	S000153	necessary for cold- or drought
LEA 2	LTRECOREATCOR15	242	(-)	CCGAC	S000153	necessary for cold- or drought
LEA 2	LTRECOREATCOR15	489	(-)	CCGAC	S000153	necessary for cold- or drought
LEA 2	LTRECOREATCOR15	637	(-)	CCGAC	S000153	necessary for cold- or drought
LEA 2	LTRECOREATCOR15	71	(-)	CCGAC	S000153	necessary for cold- or drought
LEA 2	LTRECOREATCOR15	185	(+)	CCGAC	S000153	necessary for cold- or drought
LEA 2	LTRECOREATCOR15	3	(-)	CCGAC	S000153	necessary for cold- or drought
LEA 2	LTRECOREATCOR15	64	(-)	CCGAC	S000153	necessary for cold- or drought
LEA 2	LTRECOREATCOR15	385	(-)	CCGAC	S000153	necessary for cold- or drought
LEA 2	LTRECOREATCOR15	137	(+)	CCGAC	S000153	necessary for cold- or drought
LEA 2	LTRECOREATCOR15	182	(+)	CCGAC	S000153	necessary for cold- or drought
LEA 2	LTRECOREATCOR15	232	(+)	CCGAC	S000153	necessary for cold- or drought
LEA 2	LTRECOREATCOR15	60	(-)	CCGAC	S000153	necessary for cold- or drought
LEA 2	LTRECOREATCOR15	671	(-)	CCGAC	S000153	necessary for cold- or drought
LEA 2	LTRECOREATCOR15	231	(+)	CCGAC	S000153	necessary for cold- or drought
LEA 2	LTRECOREATCOR15	497	(+)	CCGAC	S000153	necessary for cold- or drought
LEA 2	LTRECOREATCOR15	818	(-)	CCGAC	S000153	necessary for cold- or drought
LEA 2	LTRECOREATCOR15	191	(+)	CCGAC	S000153	necessary for cold- or drought
LEA 2	LTRECOREATCOR15	225	(+)	CCGAC	S000153	necessary for cold- or drought
LEA 2	LTRECOREATCOR15	231	(+)	CCGAC	S000153	necessary for cold- or drought
LEA 2	LTRECOREATCOR15	380	(-)	CCGAC	S000153	necessary for cold- or drought
LEA 2	LTRECOREATCOR15	416	(-)	CCGAC	S000153	necessary for cold- or drought
LEA 2	LTRECOREATCOR15	495	(-)	CCGAC	S000153	necessary for cold- or drought
LEA 2	LTRECOREATCOR15	585	(-)	CCGAC	S000153	necessary for cold- or drought
LEA 2	LTRECOREATCOR15	588	(-)	CCGAC	S000153	necessary for cold- or drought
LEA 2	LTRECOREATCOR15	599	(-)	CCGAC	S000153	necessary for cold- or drought
LEA 2	LTRECOREATCOR15	71	(-)	CCGAC	S000153	necessary for cold- or drought
LEA 2	LTRECOREATCOR15	185	(+)	CCGAC	S000153	necessary for cold- or drought
LEA 2	LTRECOREATCOR15	3	(-)	CCGAC	S000153	necessary for cold- or drought
LEA 2	LTRECOREATCOR15	411	(-)	CCGAC	S000153	necessary for cold- or drought
LEA 2	LTRECOREATCOR15	802	(+)	CCGAC	S000153	necessary for cold- or drought
LEA 2	LTRECOREATCOR15	14	(+)	CCGAC	S000153	necessary for cold- or drought
LEA 2	LTRECOREATCOR15	380	(-)	CCGAC	S000153	necessary for cold- or drought
LEA 2	LTRECOREATCOR15	313	(+)	CCGAC	S000153	necessary for cold- or drought
LEA 2	LTRECOREATCOR15	414	(-)	CCGAC	S000153	necessary for cold- or drought
LEA 2	LTRECOREATCOR15	576	(-)	CCGAC	S000153	necessary for cold- or drought
LEA 2	LTRECOREATCOR15	565	(-)	CCGAC	S000153	necessary for cold- or drought
LEA 2	LTRECOREATCOR15	269	(-)	CCGAC	S000153	necessary for cold- or drought
LEA 2	MYBCONSENSUSAT	554	(-)	YAACKG	S000409	MYB recognition site
LEA 2	MYBCONSENSUSAT	509	(-)	YAACKG	S000409	MYB recognition site
LEA 2	MYBCONSENSUSAT	351	(+)	YAACKG	S000409	MYB recognition site
LEA 2	MYBCONSENSUSAT	647	(-)	YAACKG	S000409	MYB recognition site
LEA 2	MYBCONSENSUSAT	700	(+)	YAACKG	S000409	MYB recognition site
LEA 2	MYBCONSENSUSAT	680	(-)	YAACKG	S000409	MYB recognition site
LEA 2	MYBCONSENSUSAT	461	(-)	YAACKG	S000409	MYB recognition site
LEA 2	MYBCONSENSUSAT	495	(+)	YAACKG	S000409	MYB recognition site
LEA 2	MYBCONSENSUSAT	702	(-)	YAACKG	S000409	MYB recognition site
LEA 2	MYBCONSENSUSAT	724	(+)	YAACKG	S000409	MYB recognition site
LEA 2	MYBCONSENSUSAT	739	(+)	YAACKG	S000409	MYB recognition site
LEA 2	MYBCONSENSUSAT	294	(-)	YAACKG	S000409	MYB recognition site
LEA 2	MYBCONSENSUSAT	332	(+)	YAACKG	S000409	MYB recognition site
LEA 2	MYBCONSENSUSAT	538	(-)	YAACKG	S000409	MYB recognition site
LEA 2	MYBCONSENSUSAT	70	(+)	YAACKG	S000409	MYB recognition site
LEA 2	MYBCONSENSUSAT	94	(+)	YAACKG	S000409	MYB recognition site
LEA 2	MYBCONSENSUSAT	262	(-)	YAACKG	S000409	MYB recognition site
LEA 2	MYBCONSENSUSAT	476	(-)	YAACKG	S000409	MYB recognition site
LEA 2	MYBCONSENSUSAT	571	(-)	YAACKG	S000409	MYB recognition site
LEA 2	MYBCONSENSUSAT	733	(+)	YAACKG	S000409	MYB recognition site
LEA 2	MYBCONSENSUSAT	13	(-)	YAACKG	S000409	MYB recognition site
LEA 2	MYBCONSENSUSAT	241	(+)	YAACKG	S000409	MYB recognition site
LEA 2	MYBCONSENSUSAT	119	(-)	YAACKG	S000409	MYB recognition site
LEA 2	MYBCONSENSUSAT	435	(-)	YAACKG	S000409	MYB recognition site
LEA 2	MYBCONSENSUSAT	526	(-)	YAACKG	S000409	MYB recognition site
LEA 2	MYBCONSENSUSAT	725	(-)	YAACKG	S000409	MYB recognition site
LEA 2	MYBCONSENSUSAT	391	(+)	YAACKG	S000409	MYB recognition site
LEA 2	MYBCONSENSUSAT	525	(-)	YAACKG	S000409	MYB recognition site
LEA 2	MYBCONSENSUSAT	135	(-)	YAACKG	S000409	MYB recognition site
LEA 2	MYBCONSENSUSAT	424	(-)	YAACKG	S000409	MYB recognition site
LEA 2	MYBCONSENSUSAT	519	(-)	YAACKG	S000409	MYB recognition site
LEA 2	MYBCONSENSUSAT	461	(-)	YAACKG	S000409	MYB recognition site
LEA 2	MYBCONSENSUSAT	495	(+)	YAACKG	S000409	MYB recognition site
LEA 2	MYBCONSENSUSAT	702	(-)	YAACKG	S000409	MYB recognition site
LEA 2	MYBCONSENSUSAT	724	(+)	YAACKG	S000409	MYB recognition site
LEA 2	MYBCONSENSUSAT	739	(+)	YAACKG	S000409	MYB recognition site
LEA 2	MYBCONSENSUSAT	376	(-)	YAACKG	S000409	MYB recognition site
LEA 2	MYBCONSENSUSAT	61	(+)	YAACKG	S000409	MYB recognition site
LEA 2	MYBCONSENSUSAT	96	(+)	YAACKG	S000409	MYB recognition site
LEA 2	MYBCONSENSUSAT	107	(+)	YAACKG	S000409	MYB recognition site
LEA 2	MYBCONSENSUSAT	511	(+)	YAACKG	S000409	MYB recognition site
LEA 2	MYBCONSENSUSAT	652	(-)	YAACKG	S000409	MYB recognition site
LEA 2	MYBCONSENSUSAT	37	(-)	YAACKG	S000409	MYB recognition site
LEA 2	MYBCONSENSUSAT	92	(-)	YAACKG	S000409	MYB recognition site
LEA 2	MYBCONSENSUSAT	600	(-)	YAACKG	S000409	MYB recognition site
LEA 2	MYBCONSENSUSAT	118	(+)	YAACKG	S000409	MYB recognition site
LEA 2	MYBCONSENSUSAT	134	(+)	YAACKG	S000409	MYB recognition site
LEA 2	MYBCONSENSUSAT	572	(+)	YAACKG	S000409	MYB recognition site
LEA 2	MYBCONSENSUSAT	514	(+)	YAACKG	S000409	MYB recognition site
LEA 2	MYBCONSENSUSAT	217	(+)	YAACKG	S000409	MYB recognition site
LEA 2	MYBCONSENSUSAT	87	(+)	YAACKG	S000409	MYB recognition site
LEA 2	MYBCONSENSUSAT	417	(+)	YAACKG	S000409	MYB recognition site
LEA 2	MYBCONSENSUSAT	268	(+)	YAACKG	S000409	MYB recognition site
LEA 2	MYBCONSENSUSAT	174	(-)	YAACKG	S000409	MYB recognition site
LEA 2	MYBCONSENSUSAT	243	(-)	YAACKG	S000409	MYB recognition site
LEA 2	MYBCONSENSUSAT	654	(+)	YAACKG	S000409	MYB recognition site
LEA 2	MYBCONSENSUSAT	1060	(+)	YAACKG	S000409	MYB recognition site
LEA 2	MYBCONSENSUSAT	7	(-)	YAACKG	S000409	MYB recognition site
LEA 2	MYBCONSENSUSAT	666	(-)	YAACKG	S000409	MYB recognition site
LEA 2	MYBCONSENSUSAT	572	(+)	YAACKG	S000409	MYB recognition site
LEA 2	MYBCONSENSUSAT	149	(+)	YAACKG	S000409	MYB recognition site
LEA 2	MYBCONSENSUSAT	119	(-)	YAACKG	S000409	MYB recognition site
LEA 2	MYBCONSENSUSAT	521	(-)	YAACKG	S000409	MYB recognition site
LEA 2	MYBCONSENSUSAT	521	(-)	YAACKG	S000409	MYB recognition site
LEA 2	MYBCONSENSUSAT	61	(+)	YAACKG	S000409	MYB recognition site
LEA 2	MYBCONSENSUSAT	96	(+)	YAACKG	S000409	MYB recognition site
LEA 2	MYBCONSENSUSAT	107	(+)	YAACKG	S000409	MYB recognition site
LEA 2	MYBCONSENSUSAT	511	(+)	YAACKG	S000409	MYB recognition site
LEA 2	MYBCONSENSUSAT	652	(-)	YAACKG	S000409	MYB recognition site
LEA 2	MYBCONSENSUSAT	291	(+)	YAACKG	S000409	MYB recognition site
LEA 2	MYBCONSENSUSAT	491	(-)	YAACKG	S000409	MYB recognition site
LEA 2	MYBCONSENSUSAT	240	(-)	YAACKG	S000409	MYB recognition site
LEA 2	MYBCONSENSUSAT	300	(-)	YAACKG	S000409	MYB recognition site
LEA 2	MYBCONSENSUSAT	174	(-)	YAACKG	S000409	MYB recognition site
LEA 2	MYBCONSENSUSAT	243	(-)	YAACKG	S000409	MYB recognition site
LEA 2	MYBCONSENSUSAT	203	(-)	YAACKG	S000409	MYB recognition site
LEA 2	MYBCONSENSUSAT	514	(-)	YAACKG	S000409	MYB recognition site
LEA 2	MYBCONSENSUSAT	666	(-)	YAACKG	S000409	MYB recognition site
LEA 2	MYBCONSENSUSAT	162	(-)	YAACKG	S000409	MYB recognition site
LEA 2	MYBCONSENSUSAT	521	(-)	YAACKG	S000409	MYB recognition site
LEA 2	MYBCONSENSUSAT	618	(-)	YAACKG	S000409	MYB recognition site
LEA 2	MYBCONSENSUSAT	119	(-)	YAACKG	S000409	MYB recognition site
LEA 2	MYBCONSENSUSAT	118	(+)	YAACKG	S000409	MYB recognition site
LEA 2	MYBCONSENSUSAT	572	(+)	YAACKG	S000409	MYB recognition site
LEA 2	MYBCONSENSUSAT	291	(+)	YAACKG	S000409	MYB recognition site
LEA 2	MYBCONSENSUSAT	491	(-)	YAACKG	S000409	MYB recognition site
LEA 2	MYBCONSENSUSAT	466	(-)	YAACKG	S000409	MYB recognition site
LEA 2	MYBCONSENSUSAT	219	(-)	YAACKG	S000409	MYB recognition site
LEA 2	MYBCONSENSUSAT	488	(-)	YAACKG	S000409	MYB recognition site
LEA 2	MYBCONSENSUSAT	589	(-)	YAACKG	S000409	MYB recognition site
LEA 2	MYBCONSENSUSAT	35	(-)	YAACKG	S000409	MYB recognition site
LEA 2	MYBCONSENSUSAT	597	(-)	YAACKG	S000409	MYB recognition site
LEA 2	MYBCONSENSUSAT	629	(-)	YAACKG	S000409	MYB recognition site
LEA 2	MYBCONSENSUSAT	737	(+)	YAACKG	S000409	MYB recognition site
LEA 2	MYBCONSENSUSAT	733	(+)	YAACKG	S000409	MYB recognition site
LEA 2	MYBCONSENSUSAT	572	(+)	YAACKG	S000409	MYB recognition site
LEA 2	MYBCONSENSUSAT	93	(-)	YAACKG	S000409	MYB recognition site
LEA 2	MYBCONSENSUSAT	1315	(-)	YAACKG	S000409	MYB recognition site
LEA 2	MYBCONSENSUSAT	1354	(+)	YAACKG	S000409	MYB recognition site
LEA 2	MYBCONSENSUSAT	220	(+)	YAACKG	S000409	MYB recognition site
LEA 2	MYBCONSENSUSAT	343	(-)	YAACKG	S000409	MYB recognition site
LEA 2	MYBCONSENSUSAT	649	(-)	YAACKG	S000409	MYB recognition site
LEA 2	MYBCONSENSUSAT	856	(-)	YAACKG	S000409	MYB recognition site
LEA 2	MYBCONSENSUSAT	60	(+)	YAACKG	S000409	MYB recognition site
LEA 2	MYBCONSENSUSAT	219	(-)	YAACKG	S000409	MYB recognition site
LEA 2	MYBCONSENSUSAT	380	(-)	YAACKG	S000409	MYB recognition site
LEA 2	MYBCONSENSUSAT	132	(-)	YAACKG	S000409	MYB recognition site
LEA 2	MYBCONSENSUSAT	149	(+)	YAACKG	S000409	MYB recognition site
LEA 2	MYBCONSENSUSAT	935	(+)	YAACKG	S000409	MYB recognition site
LEA 2	MYBCONSENSUSAT	513	(+)	YAACKG	S000409	MYB recognition site
LEA 2	MYBCONSENSUSAT	727	(+)	YAACKG	S000409	MYB recognition site
LEA 2	MYBCONSENSUSAT	724	(-)	YAACKG	S000409	MYB recognition site
LEA 2	MYBCONSENSUSAT	68	(+)	YAACKG	S000409	MYB recognition site
LEA 2	MYBCONSENSUSAT	598	(-)	YAACKG	S000409	MYB recognition site
LEA 2	MYBCONSENSUSAT	455	(+)	YAACKG	S000409	MYB recognition site
LEA 2	MYBCONSENSUSAT	529	(+)	YAACKG	S000409	MYB recognition site
LEA 2	MYBCONSENSUSAT	109	(-)	YAACKG	S000409	MYB recognition site
LEA 2	MYBCONSENSUSAT	61	(+)	YAACKG	S000409	MYB recognition site
LEA 2	MYBCONSENSUSAT	501	(+)	YAACKG	S000409	MYB recognition site
LEA 2	MYBCONSENSUSAT	534	(+)	YAACKG	S000409	MYB recognition site
LEA 2	MYBCONSENSUSAT	513	(+)	YAACKG	S000409	MYB recognition site
LEA 2	MYBCONSENSUSAT	140	(-)	YAACKG	S000409	MYB recognition site
LEA 2	MYBCONSENSUSAT	681	(+)	YAACKG	S000409	MYB recognition site
LEA 2	MYBCONSENSUSAT	732	(-)	YAACKG	S000409	MYB recognition site
LEA 2	MYBCONSENSUSAT	939	(-)	YAACKG	S000409	MYB recognition site
LEA 2	MYBCONSENSUSAT	57	(+)	YAACKG	S000409	MYB recognition site
LEA 2	MYBCONSENSUSAT	478	(+)	YAACKG	S000409	MYB recognition site
LEA 2	MYBCONSENSUSAT	391	(+)	YAACKG	S000409	MYB recognition site
LEA 2	MYBCONSENSUSAT	176	(-)	YAACKG	S000409	MYB recognition site
LEA 2	MYBCONSENSUSAT	632	(-)	YAACKG	S000409	MYB recognition site
LEA 2	MYBCONSENSUSAT	534	(+)	YAACKG	S000409	MYB recognition site
LEA 2	MYBCONSENSUSAT	525	(-)	YAACKG	S000409	MYB recognition site
LEA 2	MYBCONSENSUSAT	513	(-)	YAACKG	S000409	MYB recognition site
LEA 2	MYBCONSENSUSAT	785	(+)	YAACKG	S000409	MYB recognition site
LEA 2	MYBCONSENSUSAT	26	(-)	YAACKG	S000409	MYB recognition site
LEA 2	MYBCONSENSUSAT	482	(-)	YAACKG	S000409	MYB recognition site
LEA 2	MYBCONSENSUSAT	503	(+)	YAACKG	S000409	MYB recognition site
LEA 2	MYBCONSENSUSAT	486	(+)	YAACKG	S000409	MYB recognition site
LEA 2	MYBCONSENSUSAT	632	(-)	YAACKG	S000409	MYB recognition site
LEA 2	MYBCONSENSUSAT	646	(-)	YAACKG	S000409	MYB recognition site
LEA 2	LTRECOREATCOR15	350	(+)	CCGAC	S000153	necessary for cold- or drought
LEA 2	LTRECOREATCOR15	500	(+)	CCGAC	S000153	necessary for cold- or drought
LEA 2	CBFHV	425	(-)	RYCGAC	S000497	dehydration-responsive element
LEA 2	MYBCONSENSUSAT	372	(-)	YAACKG	S000409	MYB recognition site
LEA 2	MYBCONSENSUSAT	740	(-)	YAACKG	S000409	MYB recognition site
LEA 2	MYBCONSENSUSAT	376	(-)	YAACKG	S000409	MYB recognition site
LEA 2	ABRELATERD1	429	(-)	ACGTG	S000414	ABA responsive complex
LEA 2	ABRELATERD1	430	(+)	ACGTG	S000414	ABA responsive complex
LEA 2	ABRELATERD1	689	(+)	ACGTG	S000414	ABA responsive complex
LEA 2	ABRELATERD1	452	(+)	ACGTG	S000414	ABA responsive complex
LEA 2	ABRELATERD1	552	(+)	ACGTG	S000414	ABA responsive complex
LEA 2	ABRELATERD1	81	(+)	ACGTG	S000414	ABA responsive complex
LEA 2	ABRELATERD1	96	(-)	ACGTG	S000414	ABA responsive complex
LEA 2	ABRELATERD1	97	(+)	ACGTG	S000414	ABA responsive complex
LEA 2	ABRELATERD1	616	(+)	ACGTG	S000414	ABA responsive complex
LEA 2	ABRELATERD1	689	(+)	ACGTG	S000414	ABA responsive complex
LEA 2	ABRELATERD1	732	(+)	ACGTG	S000414	ABA responsive complex
LEA 2	ABRELATERD1	88	(-)	ACGTG	S000414	ABA responsive complex
LEA 2	ABRELATERD1	159	(+)	ACGTG	S000414	ABA responsive complex
LEA 2	ABRELATERD1	588	(-)	ACGTG	S000414	ABA responsive complex
LEA 2	AGMOTIFNTMYB	690	(-)	AGATCCAA	S000444	induced by various stress
LEA 2	AGMOTIFNTMYB	543	(+)	AGATCCAA	S000444	induced by various stress
LEA 2	AGMOTIFNTMYB	690	(-)	AGATCCAA	S000444	induced by various stress
LEA 2	ARE1	707	(+)	RGTGACNNNGC	S000022	antioxidant response element
LEA 2	ARE1	288	(+)	RGTGACNNNGC	S000022	antioxidant response element
LEA 2	ARE1	707	(+)	RGTGACNNNGC	S000022	antioxidant response element
LEA 2	ARE1	592	(-)	RGTGACNNNGC	S000022	antioxidant response element
LEA 2	ARE1	19	(-)	RGTGACNNNGC	S000022	antioxidant response element
LEA 2	ASF1MOTIFCAMV	112	(-)	TGACG	S000024	Abiotic and biotic stress
LEA 2	ABRELATERD1	35	(+)	ACGTG	S000414	ABA responsive complex
LEA 2	ABRELATERD1	277	(+)	ACGTG	S000414	ABA responsive complex
LEA 2	ABRELATERD1	598	(+)	ACGTG	S000414	ABA responsive complex
LEA 2	ABRELATERD1	419	(-)	ACGTG	S000414	ABA responsive complex
LEA 2	ABRELATERD1	476	(+)	ACGTG	S000414	ABA responsive complex
LEA 2	ABRELATERD1	41	(-)	ACGTG	S000414	ABA responsive complex
LEA 2	ABRELATERD1	236	(-)	ACGTG	S000414	ABA responsive complex
LEA 2	ABRELATERD1	250	(-)	ACGTG	S000414	ABA responsive complex
LEA 2	ABRELATERD1	427	(+)	ACGTG	S000414	ABA responsive complex
LEA 2	ABRELATERD1	154	(-)	ACGTG	S000414	ABA responsive complex
LEA 2	ABRELATERD1	155	(+)	ACGTG	S000414	ABA responsive complex
LEA 2	ABRELATERD1	184	(-)	ACGTG	S000414	ABA responsive complex
LEA 2	ABRELATERD1	381	(+)	ACGTG	S000414	ABA responsive complex
LEA 2	ABRELATERD1	472	(-)	ACGTG	S000414	ABA responsive complex
LEA 2	ABRELATERD1	473	(+)	ACGTG	S000414	ABA responsive complex
LEA 2	ABRELATERD1	435	(+)	ACGTG	S000414	ABA responsive complex
LEA 2	ABRELATERD1	88	(-)	ACGTG	S000414	ABA responsive complex
LEA 2	ABRELATERD1	598	(+)	ACGTG	S000414	ABA responsive complex
LEA 2	ABRELATERD1	233	(-)	ACGTG	S000414	ABA responsive complex
LEA 2	ABRELATERD1	247	(-)	ACGTG	S000414	ABA responsive complex
LEA 2	ABRELATERD1	424	(+)	ACGTG	S000414	ABA responsive complex
LEA 2	ABRELATERD1	236	(-)	ACGTG	S000414	ABA responsive complex
LEA 2	ABRELATERD1	427	(+)	ACGTG	S000414	ABA responsive complex
LEA 2	ABRELATERD1	154	(-)	ACGTG	S000414	ABA responsive complex
LEA 2	ABRELATERD1	155	(+)	ACGTG	S000414	ABA responsive complex
LEA 2	LTRECOREATCOR15	380	(-)	CCGAC	S000153	necessary for cold- or drought
LEA 2	LTRECOREATCOR15	416	(-)	CCGAC	S000153	necessary for cold- or drought
LEA 2	ABRELATERD1	184	(-)	ACGTG	S000414	ABA responsive complex
LEA 2	ABRELATERD1	472	(-)	ACGTG	S000414	ABA responsive complex
LEA 2	ASF1MOTIFCAMV	193	(-)	TGACG	S000024	Abiotic and biotic stress
LEA 2	LTRECOREATCOR15	495	(-)	CCGAC	S000153	necessary for cold- or drought
LEA 2	LTRECOREATCOR15	518	(-)	CCGAC	S000153	necessary for cold- or drought
LEA 2	LTRECOREATCOR15	668	(-)	CCGAC	S000153	necessary for cold- or drought
LEA 2	ABRELATERD1	473	(+)	ACGTG	S000414	ABA responsive complex
LEA 2	ABRELATERD1	715	(+)	ACGTG	S000414	ABA responsive complex
LEA 2	ABRELATERD1	236	(-)	ACGTG	S000414	ABA responsive complex
LEA 2	ABRELATERD1	427	(+)	ACGTG	S000414	ABA responsive complex
LEA 2	ABRELATERD1	277	(+)	ACGTG	S000414	ABA responsive complex
LEA 2	ABRELATERD1	81	(+)	ACGTG	S000414	ABA responsive complex
LEA 2	ASF1MOTIFCAMV	116	(-)	TGACG	S000024	Abiotic and biotic stress
LEA 2	ASF1MOTIFCAMV	316	(-)	TGACG	S000024	Abiotic and biotic stress
LEA 2	ASF1MOTIFCAMV	592	(+)	TGACG	S000024	Abiotic and biotic stress
LEA 2	ASF1MOTIFCAMV	55	(-)	TGACG	S000024	Abiotic and biotic stress
LEA 2	ASF1MOTIFCAMV	503	(+)	TGACG	S000024	Abiotic and biotic stress
LEA 2	ASF1MOTIFCAMV	402	(+)	TGACG	S000024	Abiotic and biotic stress
LEA 2	ASF1MOTIFCAMV	339	(-)	TGACG	S000024	Abiotic and biotic stress
LEA 2	ASF1MOTIFCAMV	520	(+)	TGACG	S000024	Abiotic and biotic stress
LEA 2	ASF1MOTIFCAMV	525	(-)	TGACG	S000024	Abiotic and biotic stress
LEA 2	ASF1MOTIFCAMV	412	(+)	TGACG	S000024	Abiotic and biotic stress
LEA 2	CBFHV	425	(+)	RYCGAC	S000497	dehydration-responsive element
LEA 2	CBFHV	952	(-)	RYCGAC	S000497	dehydration-responsive element
LEA 2	CBFHV	960	(-)	RYCGAC	S000497	dehydration-responsive element
LEA 2	LTRECOREATCOR15	180	(-)	CCGAC	S000153	necessary for cold- or drought
LEA 2	LTRECOREATCOR15	465	(-)	CCGAC	S000153	necessary for cold- or drought
LEA 2	LTRECOREATCOR15	11	(+)	CCGAC	S000153	necessary for cold- or drought
LEA 2	LTRECOREATCOR15	392	(-)	CCGAC	S000153	necessary for cold- or drought
LEA 2	LTRECOREATCOR15	849	(+)	CCGAC	S000153	necessary for cold- or drought
LEA 2	LTRECOREATCOR15	463	(-)	CCGAC	S000153	necessary for cold- or drought
LEA 2	MYBCONSENSUSAT	680	(-)	YAACKG	S000409	MYB recognition site
LEA 2	MYBCONSENSUSAT	292	(-)	YAACKG	S000409	MYB recognition site
LEA 2	MYBCONSENSUSAT	412	(+)	YAACKG	S000409	MYB recognition site
LEA 2	MYBCONSENSUSAT	572	(+)	YAACKG	S000409	MYB recognition site
LEA 2	MYBCONSENSUSAT	513	(+)	YAACKG	S000409	MYB recognition site
LEA 2	MYBCONSENSUSAT	724	(-)	YAACKG	S000409	MYB recognition site
LEA 2	MYBCONSENSUSAT	514	(-)	YAACKG	S000409	MYB recognition site
LEA 2	MYBCONSENSUSAT	513	(-)	YAACKG	S000409	MYB recognition site
LEA 2	MYBCONSENSUSAT	727	(+)	YAACKG	S000409	MYB recognition site
LEA 2	MYBCONSENSUSAT	577	(+)	YAACKG	S000409	MYB recognition site
LEA 2	MYBCONSENSUSAT	840	(-)	YAACKG	S000409	MYB recognition site
LEA 2	MYBCONSENSUSAT	856	(-)	YAACKG	S000409	MYB recognition site
LEA 2	MYBCONSENSUSAT	268	(+)	YAACKG	S000409	MYB recognition site
LEA 2	MYBCONSENSUSAT	445	(-)	YAACKG	S000409	MYB recognition site
LEA 2	ASF1MOTIFCAMV	110	(+)	TGACG	S000024	Abiotic and biotic stress
LEA 2	CBFHV	960	(+)	RYCGAC	S000497	dehydration-responsive element
LEA 2	LTRECOREATCOR15	215	(-)	CCGAC	S000153	necessary for cold- or drought
LEA 2	MYBCONSENSUSAT	526	(-)	YAACKG	S000409	MYB recognition site
LEA 2	MYBCONSENSUSAT	124	(-)	YAACKG	S000409	MYB recognition site
LEA 2	ASF1MOTIFCAMV	162	(-)	TGACG	S000024	Abiotic and biotic stress
LEA 2	ASF1MOTIFCAMV	168	(-)	TGACG	S000024	Abiotic and biotic stress
LEA 2	ASF1MOTIFCAMV	107	(-)	TGACG	S000024	Abiotic and biotic stress
LEA 2	ASF1MOTIFCAMV	293	(+)	TGACG	S000024	Abiotic and biotic stress
LEA 2	ASF1MOTIFCAMV	604	(+)	TGACG	S000024	Abiotic and biotic stress
LEA 2	ASF1MOTIFCAMV	140	(-)	TGACG	S000024	Abiotic and biotic stress
LEA 2	ASF1MOTIFCAMV	217	(-)	TGACG	S000024	Abiotic and biotic stress
LEA 2	ASF1MOTIFCAMV	2	(+)	TGACG	S000024	Abiotic and biotic stress
LEA 2	ASF1MOTIFCAMV	278	(-)	TGACG	S000024	Abiotic and biotic stress
LEA 2	ASF1MOTIFCAMV	615	(-)	TGACG	S000024	Abiotic and biotic stress
LEA 2	ASF1MOTIFCAMV	630	(-)	TGACG	S000024	Abiotic and biotic stress
LEA 2	ASF1MOTIFCAMV	195	(-)	TGACG	S000024	Abiotic and biotic stress
LEA 2	ASF1MOTIFCAMV	617	(+)	TGACG	S000024	Abiotic and biotic stress
LEA 2	ASF1MOTIFCAMV	159	(-)	TGACG	S000024	Abiotic and biotic stress
LEA 2	ASF1MOTIFCAMV	430	(+)	TGACG	S000024	Abiotic and biotic stress
LEA 2	ASF1MOTIFCAMV	208	(-)	TGACG	S000024	Abiotic and biotic stress
LEA 2	ASF1MOTIFCAMV	565	(+)	TGACG	S000024	Abiotic and biotic stress
LEA 2	CBFHV	273	(-)	RYCGAC	S000497	dehydration-responsive element
LEA 2	CBFHV	322	(+)	RYCGAC	S000497	dehydration-responsive element
LEA 2	CBFHV	3	(-)	RYCGAC	S000497	dehydration-responsive element
LEA 2	CBFHV	411	(-)	RYCGAC	S000497	dehydration-responsive element
LEA 2	CBFHV	801	(+)	RYCGAC	S000497	dehydration-responsive element
LEA 2	CBFHV	312	(+)	RYCGAC	S000497	dehydration-responsive element
LEA 2	CBFHV	622	(-)	RYCGAC	S000497	dehydration-responsive element
LEA 2	CBFHV	622	(+)	RYCGAC	S000497	dehydration-responsive element
LEA 2	CBFHV	331	(-)	RYCGAC	S000497	dehydration-responsive element
LEA 2	LTRECOREATCOR15	428	(-)	CCGAC	S000153	necessary for cold- or drought
LEA 2	LTRECOREATCOR15	590	(-)	CCGAC	S000153	necessary for cold- or drought
LEA 2	LTRECOREATCOR15	689	(+)	CCGAC	S000153	necessary for cold- or drought
LEA 2	LTRECOREATCOR15	3	(-)	CCGAC	S000153	necessary for cold- or drought
LEA 2	LTRECOREATCOR15	64	(-)	CCGAC	S000153	necessary for cold- or drought
LEA 2	LTRECOREATCOR15	385	(-)	CCGAC	S000153	necessary for cold- or drought
LEA 2	LTRECOREATCOR15	3	(-)	CCGAC	S000153	necessary for cold- or drought
LEA 2	LTRECOREATCOR15	462	(-)	CCGAC	S000153	necessary for cold- or drought
LEA 2	LTRECOREATCOR15	175	(-)	CCGAC	S000153	necessary for cold- or drought
LEA 2	LTRECOREATCOR15	294	(-)	CCGAC	S000153	necessary for cold- or drought
LEA 2	LTRECOREATCOR15	330	(-)	CCGAC	S000153	necessary for cold- or drought
LEA 2	LTRECOREATCOR15	562	(-)	CCGAC	S000153	necessary for cold- or drought
LEA 2	LTRECOREATCOR15	191	(+)	CCGAC	S000153	necessary for cold- or drought
LEA 2	LTRECOREATCOR15	330	(+)	CCGAC	S000153	necessary for cold- or drought
LEA 2	LTRECOREATCOR15	361	(-)	CCGAC	S000153	necessary for cold- or drought
LEA 2	LTRECOREATCOR15	244	(-)	CCGAC	S000153	necessary for cold- or drought
LEA 2	LTRECOREATCOR15	1098	(-)	CCGAC	S000153	necessary for cold- or drought
LEA 2	MYBCONSENSUSAT	455	(+)	YAACKG	S000409	MYB recognition site
LEA 2	MYBCONSENSUSAT	529	(+)	YAACKG	S000409	MYB recognition site
LEA 2	MYBCONSENSUSAT	659	(+)	YAACKG	S000409	MYB recognition site
LEA 2	MYBCONSENSUSAT	162	(-)	YAACKG	S000409	MYB recognition site
LEA 2	MYBCONSENSUSAT	220	(+)	YAACKG	S000409	MYB recognition site
LEA 2	MYBCONSENSUSAT	343	(-)	YAACKG	S000409	MYB recognition site
LEA 2	MYBCONSENSUSAT	93	(-)	YAACKG	S000409	MYB recognition site
LEA 2	MYBCONSENSUSAT	1161	(-)	YAACKG	S000409	MYB recognition site
LEA 2	MYBCONSENSUSAT	1315	(-)	YAACKG	S000409	MYB recognition site
LEA 2	MYBCONSENSUSAT	1354	(+)	YAACKG	S000409	MYB recognition site
LEA 2	MYBCONSENSUSAT	615	(-)	YAACKG	S000409	MYB recognition site
LEA 2	MYBCONSENSUSAT	219	(-)	YAACKG	S000409	MYB recognition site
LEA 2	MYBCONSENSUSAT	470	(-)	YAACKG	S000409	MYB recognition site
LEA 2	MYBCONSENSUSAT	626	(-)	YAACKG	S000409	MYB recognition site
LEA 2	MYBCONSENSUSAT	292	(-)	YAACKG	S000409	MYB recognition site
LEA 2	MYBCONSENSUSAT	412	(+)	YAACKG	S000409	MYB recognition site
LEA 2	MYBCONSENSUSAT	203	(-)	YAACKG	S000409	MYB recognition site
LEA 2	MYBCONSENSUSAT	514	(-)	YAACKG	S000409	MYB recognition site
LEA 2	MYBCONSENSUSAT	185	(+)	YAACKG	S000409	MYB recognition site
LEA 2	MYBCONSENSUSAT	372	(-)	YAACKG	S000409	MYB recognition site
LEA 2	MYBCONSENSUSAT	399	(+)	YAACKG	S000409	MYB recognition site
LEA 2	MYBCONSENSUSAT	372	(-)	YAACKG	S000409	MYB recognition site
LEA 2	MYBCONSENSUSAT	740	(-)	YAACKG	S000409	MYB recognition site
LEA 2	MYBCONSENSUSAT	282	(-)	YAACKG	S000409	MYB recognition site
LEA 2	MYBCORE	61	(-)	CNGTTR	S000176	Dehydratio/water stress
LEA 2	MYBCORE	93	(-)	CNGTTR	S000176	Dehydratio/water stress
LEA 2	MYBCORE	480	(-)	CNGTTR	S000176	Dehydratio/water stress
LEA 2	MYBCORE	501	(-)	CNGTTR	S000176	Dehydratio/water stress
LEA 2	MYBCORE	529	(-)	CNGTTR	S000176	Dehydratio/water stress
LEA 2	MYBCORE	451	(+)	CNGTTR	S000176	Dehydratio/water stress
LEA 2	MYBCORE	632	(+)	CNGTTR	S000176	Dehydratio/water stress
LEA 2	MYBCORE	646	(+)	CNGTTR	S000176	Dehydratio/water stress
LEA 2	MYBCORE	387	(-)	CNGTTR	S000176	Dehydratio/water stress
LEA 2	MYBCORE	588	(+)	CNGTTR	S000176	Dehydratio/water stress
LEA 2	MYBCORE	605	(-)	CNGTTR	S000176	Dehydratio/water stress
LEA 2	MYBCORE	33	(-)	CNGTTR	S000176	Dehydratio/water stress
LEA 2	MYBCORE	433	(+)	CNGTTR	S000176	Dehydratio/water stress
LEA 2	MYBCORE	626	(+)	CNGTTR	S000176	Dehydratio/water stress
LEA 2	MYBCORE	688	(+)	CNGTTR	S000176	Dehydratio/water stress
LEA 2	MYBCORE	372	(+)	CNGTTR	S000176	Dehydratio/water stress
LEA 2	MYBCORE	525	(+)	CNGTTR	S000176	Dehydratio/water stress
LEA 2	MYBCORE	554	(+)	CNGTTR	S000176	Dehydratio/water stress
LEA 2	ABRELATERD1	96	(-)	ACGTG	S000414	ABA responsive complex
LEA 2	ABRELATERD1	97	(+)	ACGTG	S000414	ABA responsive complex
LEA 2	ABRELATERD1	419	(-)	ACGTG	S000414	ABA responsive complex
LEA 2	ABRELATERD1	389	(-)	ACGTG	S000414	ABA responsive complex
LEA 2	ABRELATERD1	546	(+)	ACGTG	S000414	ABA responsive complex
LEA 2	ABRELATERD1	433	(+)	ACGTG	S000414	ABA responsive complex
LEA 2	ABRELATERD1	913	(+)	ACGTG	S000414	ABA responsive complex
LEA 2	ABRELATERD1	1168	(-)	ACGTG	S000414	ABA responsive complex
LEA 2	ASF1MOTIFCAMV	281	(-)	TGACG	S000024	Abiotic and biotic stress
LEA 2	ASF1MOTIFCAMV	326	(+)	TGACG	S000024	Abiotic and biotic stress
LEA 2	ASF1MOTIFCAMV	363	(+)	TGACG	S000024	Abiotic and biotic stress
LEA 2	ASF1MOTIFCAMV	412	(+)	TGACG	S000024	Abiotic and biotic stress
LEA 2	ASF1MOTIFCAMV	113	(-)	TGACG	S000024	Abiotic and biotic stress
LEA 2	ASF1MOTIFCAMV	363	(+)	TGACG	S000024	Abiotic and biotic stress
LEA 2	ASF1MOTIFCAMV	366	(-)	TGACG	S000024	Abiotic and biotic stress
LEA 2	ASF1MOTIFCAMV	44	(-)	TGACG	S000024	Abiotic and biotic stress
LEA 2	ASF1MOTIFCAMV	222	(-)	TGACG	S000024	Abiotic and biotic stress
LEA 2	ASF1MOTIFCAMV	920	(+)	TGACG	S000024	Abiotic and biotic stress
LEA 2	ASF1MOTIFCAMV	42	(+)	TGACG	S000024	Abiotic and biotic stress
LEA 2	ASF1MOTIFCAMV	61	(+)	TGACG	S000024	Abiotic and biotic stress
LEA 2	ASF1MOTIFCAMV	286	(+)	TGACG	S000024	Abiotic and biotic stress
LEA 2	ASF1MOTIFCAMV	293	(+)	TGACG	S000024	Abiotic and biotic stress
LEA 2	ASF1MOTIFCAMV	351	(-)	TGACG	S000024	Abiotic and biotic stress
LEA 2	ASF1MOTIFCAMV	396	(-)	TGACG	S000024	Abiotic and biotic stress
LEA 2	ASF1MOTIFCAMV	654	(+)	TGACG	S000024	Abiotic and biotic stress
LEA 2	ASF1MOTIFCAMV	675	(-)	TGACG	S000024	Abiotic and biotic stress
LEA 2	ASF1MOTIFCAMV	370	(-)	TGACG	S000024	Abiotic and biotic stress
LEA 2	ASF1MOTIFCAMV	177	(-)	TGACG	S000024	Abiotic and biotic stress
LEA 2	CBFHV	225	(-)	RYCGAC	S000497	dehydration-responsive element
LEA 2	CBFHV	535	(-)	RYCGAC	S000497	dehydration-responsive element
LEA 2	CBFHV	75	(-)	RYCGAC	S000497	dehydration-responsive element
LEA 2	CBFHV	75	(+)	RYCGAC	S000497	dehydration-responsive element
LEA 2	CBFHV	541	(-)	RYCGAC	S000497	dehydration-responsive element
LEA 2	CBFHV	3	(-)	RYCGAC	S000497	dehydration-responsive element
LEA 2	LTRECOREATCOR15	554	(-)	CCGAC	S000153	necessary for cold- or drought
LEA 2	LTRECOREATCOR15	392	(-)	CCGAC	S000153	necessary for cold- or drought
LEA 2	LTRECOREATCOR15	715	(+)	CCGAC	S000153	necessary for cold- or drought
LEA 2	LTRECOREATCOR15	127	(+)	CCGAC	S000153	necessary for cold- or drought
LEA 2	LTRECOREATCOR15	225	(-)	CCGAC	S000153	necessary for cold- or drought
LEA 2	MYB1AT	402	(+)	WAACCA	S000408	MYB recognition site
LEA 2	MYB1AT	868	(-)	WAACCA	S000408	MYB recognition site
LEA 2	MYB1AT	8	(+)	WAACCA	S000408	MYB recognition site
LEA 2	MYB1AT	464	(+)	WAACCA	S000408	MYB recognition site
LEA 2	MYB1AT	247	(-)	WAACCA	S000408	MYB recognition site
LEA 2	MYB1AT	261	(+)	WAACCA	S000408	MYB recognition site
LEA 2	MYB1AT	231	(+)	WAACCA	S000408	MYB recognition site
LEA 2	MYB1AT	62	(+)	WAACCA	S000408	MYB recognition site
LEA 2	MYB1AT	160	(+)	WAACCA	S000408	MYB recognition site
LEA 2	MYB1AT	24	(+)	WAACCA	S000408	MYB recognition site
LEA 2	MYB1AT	402	(+)	WAACCA	S000408	MYB recognition site
LEA 2	MYB1AT	742	(-)	WAACCA	S000408	MYB recognition site
LEA 2	MYB1AT	165	(-)	WAACCA	S000408	MYB recognition site
LEA 2	MYBCORE	124	(+)	CNGTTR	S000176	Dehydratio/water stress
LEA 2	MYBCORE	225	(+)	CNGTTR	S000176	Dehydratio/water stress
LEA 2	MYBCORE	634	(-)	CNGTTR	S000176	Dehydratio/water stress
LEA 2	MYBCORE	351	(-)	CNGTTR	S000176	Dehydratio/water stress
LEA 2	MYBCORE	647	(+)	CNGTTR	S000176	Dehydratio/water stress
LEA 2	MYBCORE	700	(-)	CNGTTR	S000176	Dehydratio/water stress
LEA 2	MYBCORE	552	(+)	CNGTTR	S000176	Dehydratio/water stress
LEA 2	MYBCORE	680	(+)	CNGTTR	S000176	Dehydratio/water stress
LEA 2	MYBCORE	226	(+)	CNGTTR	S000176	Dehydratio/water stress
LEA 2	MYBCORE	461	(+)	CNGTTR	S000176	Dehydratio/water stress
LEA 2	MYBCORE	495	(-)	CNGTTR	S000176	Dehydratio/water stress
LEA 2	MYBCORE	702	(+)	CNGTTR	S000176	Dehydratio/water stress
LEA 2	MYBCORE	724	(-)	CNGTTR	S000176	Dehydratio/water stress
LEA 2	MYBCORE	739	(-)	CNGTTR	S000176	Dehydratio/water stress
LEA 2	MYBCORE	294	(+)	CNGTTR	S000176	Dehydratio/water stress
LEA 2	MYBCORE	332	(-)	CNGTTR	S000176	Dehydratio/water stress
LEA 2	MYBCORE	538	(+)	CNGTTR	S000176	Dehydratio/water stress
LEA 2	MYBCORE	70	(-)	CNGTTR	S000176	Dehydratio/water stress
LEA 2	MYBCORE	94	(-)	CNGTTR	S000176	Dehydratio/water stress
LEA 2	MYBCORE	183	(+)	CNGTTR	S000176	Dehydratio/water stress
LEA 2	MYBCORE	262	(+)	CNGTTR	S000176	Dehydratio/water stress
LEA 2	MYBCORE	476	(+)	CNGTTR	S000176	Dehydratio/water stress
LEA 2	MYBCORE	571	(+)	CNGTTR	S000176	Dehydratio/water stress
LEA 2	MYBCORE	733	(-)	CNGTTR	S000176	Dehydratio/water stress
LEA 2	MYBCORE	797	(-)	CNGTTR	S000176	Dehydratio/water stress
LEA 2	MYBCORE	29	(-)	CNGTTR	S000176	Dehydratio/water stress
LEA 2	MYBCORE	211	(-)	CNGTTR	S000176	Dehydratio/water stress
LEA 2	MYBCORE	13	(+)	CNGTTR	S000176	Dehydratio/water stress
LEA 2	MYBCORE	175	(-)	CNGTTR	S000176	Dehydratio/water stress
LEA 2	MYBCORE	241	(-)	CNGTTR	S000176	Dehydratio/water stress
LEA 2	MYB1AT	442	(-)	WAACCA	S000408	MYB recognition site
LEA 2	MYBCORE	450	(+)	CNGTTR	S000176	Dehydratio/water stress
LEA 2	MYBCORE	599	(+)	CNGTTR	S000176	Dehydratio/water stress
LEA 2	ASF1MOTIFCAMV	397	(-)	TGACG	S000024	Abiotic and biotic stress
LEA 2	MYBCORE	74	(-)	CNGTTR	S000176	Dehydratio/water stress
LEA 2	MYBCORE	119	(+)	CNGTTR	S000176	Dehydratio/water stress
LEA 2	ASF1MOTIFCAMV	1027	(+)	TGACG	S000024	Abiotic and biotic stress
LEA 2	ASF1MOTIFCAMV	113	(+)	TGACG	S000024	Abiotic and biotic stress
LEA 2	ABRELATERD1	241	(-)	ACGTG	S000414	ABA responsive complex
LEA 2	ABRELATERD1	447	(+)	ACGTG	S000414	ABA responsive complex
LEA 2	ABRELATERD1	983	(+)	ACGTG	S000414	ABA responsive complex
LEA 2	ASF1MOTIFCAMV	599	(+)	TGACG	S000024	Abiotic and biotic stress
LEA 2	ASF1MOTIFCAMV	403	(-)	TGACG	S000024	Abiotic and biotic stress
LEA 2	ASF1MOTIFCAMV	626	(+)	TGACG	S000024	Abiotic and biotic stress
LEA 2	ASF1MOTIFCAMV	36	(-)	TGACG	S000024	Abiotic and biotic stress
LEA 2	ASF1MOTIFCAMV	189	(-)	TGACG	S000024	Abiotic and biotic stress
LEA 2	CBFHV	513	(-)	RYCGAC	S000497	dehydration-responsive element
LEA 2	CBFHV	26	(-)	RYCGAC	S000497	dehydration-responsive element
LEA 2	CBFHV	422	(-)	RYCGAC	S000497	dehydration-responsive element
LEA 2	MYB1AT	15	(+)	WAACCA	S000408	MYB recognition site
LEA 2	MYB1AT	452	(-)	WAACCA	S000408	MYB recognition site
LEA 2	MYB1AT	231	(+)	WAACCA	S000408	MYB recognition site
LEA 2	MYB1AT	11	(+)	WAACCA	S000408	MYB recognition site
LEA 2	MYBCORE	435	(+)	CNGTTR	S000176	Dehydratio/water stress
LEA 2	MYBCORE	523	(-)	CNGTTR	S000176	Dehydratio/water stress
LEA 2	MYBCORE	526	(+)	CNGTTR	S000176	Dehydratio/water stress
LEA 2	MYBCORE	725	(+)	CNGTTR	S000176	Dehydratio/water stress
LEA 2	MYBCORE	63	(-)	CNGTTR	S000176	Dehydratio/water stress
LEA 2	MYBCORE	115	(+)	CNGTTR	S000176	Dehydratio/water stress
LEA 2	MYBCORE	391	(-)	CNGTTR	S000176	Dehydratio/water stress
LEA 2	MYBCORE	372	(+)	CNGTTR	S000176	Dehydratio/water stress
LEA 2	MYBCORE	525	(+)	CNGTTR	S000176	Dehydratio/water stress
LEA 2	MYBCORE	554	(+)	CNGTTR	S000176	Dehydratio/water stress
LEA 2	MYBCORE	135	(+)	CNGTTR	S000176	Dehydratio/water stress
LEA 2	MYBCORE	387	(+)	CNGTTR	S000176	Dehydratio/water stress
LEA 2	MYBCORE	134	(+)	CNGTTR	S000176	Dehydratio/water stress
LEA 2	MYBCORE	210	(+)	CNGTTR	S000176	Dehydratio/water stress
LEA 2	MYBCORE	332	(-)	CNGTTR	S000176	Dehydratio/water stress
LEA 2	MYBCORE	424	(+)	CNGTTR	S000176	Dehydratio/water stress
LEA 2	ABRELATERD1	35	(+)	ACGTG	S000414	ABA responsive complex
LEA 2	ABRELATERD1	590	(-)	ACGTG	S000414	ABA responsive complex
LEA 2	ABRELATERD1	96	(-)	ACGTG	S000414	ABA responsive complex
LEA 2	ABRELATERD1	97	(+)	ACGTG	S000414	ABA responsive complex
LEA 2	ABRELATERD1	370	(+)	ACGTG	S000414	ABA responsive complex
LEA 2	ABRELATERD1	309	(-)	ACGTG	S000414	ABA responsive complex
LEA 2	ABRELATERD1	206	(-)	ACGTG	S000414	ABA responsive complex
LEA 2	ABRELATERD1	402	(+)	ACGTG	S000414	ABA responsive complex
LEA 2	ABRELATERD1	493	(-)	ACGTG	S000414	ABA responsive complex
LEA 2	ABRELATERD1	494	(+)	ACGTG	S000414	ABA responsive complex
LEA 2	ABRELATERD1	264	(-)	ACGTG	S000414	ABA responsive complex
LEA 2	ABRELATERD1	417	(-)	ACGTG	S000414	ABA responsive complex
LEA 2	ABRELATERD1	418	(+)	ACGTG	S000414	ABA responsive complex
LEA 2	ASF1MOTIFCAMV	664	(+)	TGACG	S000024	Abiotic and biotic stress
LEA 2	ASF1MOTIFCAMV	214	(-)	TGACG	S000024	Abiotic and biotic stress
LEA 2	ASF1MOTIFCAMV	384	(+)	TGACG	S000024	Abiotic and biotic stress
LEA 2	ASF1MOTIFCAMV	244	(-)	TGACG	S000024	Abiotic and biotic stress
LEA 2	ASF1MOTIFCAMV	494	(+)	TGACG	S000024	Abiotic and biotic stress
LEA 2	ASF1MOTIFCAMV	162	(-)	TGACG	S000024	Abiotic and biotic stress
LEA 2	ASF1MOTIFCAMV	56	(-)	TGACG	S000024	Abiotic and biotic stress
LEA 2	ASF1MOTIFCAMV	214	(-)	TGACG	S000024	Abiotic and biotic stress
LEA 2	ASF1MOTIFCAMV	402	(+)	TGACG	S000024	Abiotic and biotic stress
LEA 2	ASF1MOTIFCAMV	217	(-)	TGACG	S000024	Abiotic and biotic stress
LEA 2	ASF1MOTIFCAMV	70	(-)	TGACG	S000024	Abiotic and biotic stress
LEA 2	ASF1MOTIFCAMV	26	(+)	TGACG	S000024	Abiotic and biotic stress
LEA 2	ASF1MOTIFCAMV	143	(-)	TGACG	S000024	Abiotic and biotic stress
LEA 2	ASF1MOTIFCAMV	963	(+)	TGACG	S000024	Abiotic and biotic stress
LEA 2	ASF1MOTIFCAMV	1081	(-)	TGACG	S000024	Abiotic and biotic stress
LEA 2	ASF1MOTIFCAMV	266	(-)	TGACG	S000024	Abiotic and biotic stress
LEA 2	ASF1MOTIFCAMV	97	(-)	TGACG	S000024	Abiotic and biotic stress
LEA 2	ASF1MOTIFCAMV	911	(+)	TGACG	S000024	Abiotic and biotic stress
LEA 2	ATHB1ATCONSENSUS	1531	(-)	CAATWATTG	S000317	Abiotic and biotic stress
LEA 2	ATHB1ATCONSENSUS	1531	(+)	CAATWATTG	S000317	Abiotic and biotic stress
LEA 2	BOXLCOREDCPAL	559	(-)	ACCWWCC	S000492	MYB responsive
LEA 2	CBFHV	422	(+)	RYCGAC	S000497	dehydration-responsive element
LEA 2	CBFHV	210	(-)	RYCGAC	S000497	dehydration-responsive element
LEA 2	CBFHV	242	(-)	RYCGAC	S000497	dehydration-responsive element
LEA 2	CBFHV	489	(-)	RYCGAC	S000497	dehydration-responsive element
LEA 2	CBFHV	698	(-)	RYCGAC	S000497	dehydration-responsive element
LEA 2	CBFHV	184	(+)	RYCGAC	S000497	dehydration-responsive element
LEA 2	CBFHV	3	(-)	RYCGAC	S000497	dehydration-responsive element
LEA 2	CBFHV	64	(-)	RYCGAC	S000497	dehydration-responsive element
LEA 2	CBFHV	521	(-)	RYCGAC	S000497	dehydration-responsive element
LEA 2	CBFHV	181	(+)	RYCGAC	S000497	dehydration-responsive element
LEA 2	CBFHV	60	(-)	RYCGAC	S000497	dehydration-responsive element
LEA 2	CBFHV	212	(-)	RYCGAC	S000497	dehydration-responsive element
LEA 2	CBFHV	212	(+)	RYCGAC	S000497	dehydration-responsive element
LEA 2	CBFHV	248	(-)	RYCGAC	S000497	dehydration-responsive element
LEA 2	CBFHV	294	(-)	RYCGAC	S000497	dehydration-responsive element
LEA 2	CBFHV	37	(-)	RYCGAC	S000497	dehydration-responsive element
LEA 2	CBFHV	37	(+)	RYCGAC	S000497	dehydration-responsive element
LEA 2	CBFHV	122	(-)	RYCGAC	S000497	dehydration-responsive element
LEA 2	LTRECOREATCOR15	637	(-)	CCGAC	S000153	necessary for cold- or drought
LEA 2	LTRECOREATCOR15	601	(+)	CCGAC	S000153	necessary for cold- or drought
LEA 2	LTRECOREATCOR15	777	(-)	CCGAC	S000153	necessary for cold- or drought
LEA 2	LTRECOREATCOR15	3	(-)	CCGAC	S000153	necessary for cold- or drought
LEA 2	LTRECOREATCOR15	449	(-)	CCGAC	S000153	necessary for cold- or drought
LEA 2	MYB1AT	54	(+)	WAACCA	S000408	MYB recognition site
LEA 2	MYB1AT	195	(-)	WAACCA	S000408	MYB recognition site
LEA 2	MYB1AT	62	(+)	WAACCA	S000408	MYB recognition site
LEA 2	MYB1AT	628	(+)	WAACCA	S000408	MYB recognition site
LEA 2	MYB1AT	156	(+)	WAACCA	S000408	MYB recognition site
LEA 2	MYB1AT	293	(-)	WAACCA	S000408	MYB recognition site
LEA 2	MYB1AT	323	(-)	WAACCA	S000408	MYB recognition site
LEA 2	MYB1AT	22	(+)	WAACCA	S000408	MYB recognition site
LEA 2	MYB1AT	666	(+)	WAACCA	S000408	MYB recognition site
LEA 2	MYBCORE	519	(+)	CNGTTR	S000176	Dehydratio/water stress
LEA 2	MYBCORE	226	(+)	CNGTTR	S000176	Dehydratio/water stress
LEA 2	MYBCORE	461	(+)	CNGTTR	S000176	Dehydratio/water stress
LEA 2	MYBCORE	495	(-)	CNGTTR	S000176	Dehydratio/water stress
LEA 2	MYBCORE	702	(+)	CNGTTR	S000176	Dehydratio/water stress
LEA 2	MYBCORE	724	(-)	CNGTTR	S000176	Dehydratio/water stress
LEA 2	MYBCORE	739	(-)	CNGTTR	S000176	Dehydratio/water stress
LEA 2	MYBCORE	376	(+)	CNGTTR	S000176	Dehydratio/water stress
LEA 2	MYBCORE	199	(+)	CNGTTR	S000176	Dehydratio/water stress
LEA 2	MYBCORE	240	(+)	CNGTTR	S000176	Dehydratio/water stress
LEA 2	MYBCORE	341	(+)	CNGTTR	S000176	Dehydratio/water stress
LEA 2	MYBCORE	38	(-)	CNGTTR	S000176	Dehydratio/water stress
LEA 2	MYBCORE	61	(-)	CNGTTR	S000176	Dehydratio/water stress
LEA 2	MYBCORE	96	(-)	CNGTTR	S000176	Dehydratio/water stress
LEA 2	MYBCORE	107	(-)	CNGTTR	S000176	Dehydratio/water stress
LEA 2	MYBCORE	174	(-)	CNGTTR	S000176	Dehydratio/water stress
LEA 2	MYBCORE	511	(-)	CNGTTR	S000176	Dehydratio/water stress
LEA 2	MYBCORE	538	(-)	CNGTTR	S000176	Dehydratio/water stress
LEA 2	MYBCORE	652	(+)	CNGTTR	S000176	Dehydratio/water stress
LEA 2	MYBCORE	37	(+)	CNGTTR	S000176	Dehydratio/water stress
LEA 2	MYBCORE	92	(+)	CNGTTR	S000176	Dehydratio/water stress
LEA 2	MYBCORE	514	(+)	CNGTTR	S000176	Dehydratio/water stress
LEA 2	MYBCORE	600	(+)	CNGTTR	S000176	Dehydratio/water stress
LEA 2	MYBCORE	28	(-)	CNGTTR	S000176	Dehydratio/water stress
LEA 2	MYBCORE	96	(-)	CNGTTR	S000176	Dehydratio/water stress
LEA 2	MYBCORE	118	(-)	CNGTTR	S000176	Dehydratio/water stress
LEA 2	MYBCORE	134	(-)	CNGTTR	S000176	Dehydratio/water stress
LEA 2	MYBCORE	219	(+)	CNGTTR	S000176	Dehydratio/water stress
LEA 2	MYBCORE	278	(-)	CNGTTR	S000176	Dehydratio/water stress
LEA 2	MYBCORE	572	(-)	CNGTTR	S000176	Dehydratio/water stress
LEA 2	MYBCORE	315	(-)	CNGTTR	S000176	Dehydratio/water stress
LEA 2	MYBCORE	514	(-)	CNGTTR	S000176	Dehydratio/water stress
LEA 2	MYBCORE	18	(-)	CNGTTR	S000176	Dehydratio/water stress
LEA 2	MYBCORE	217	(-)	CNGTTR	S000176	Dehydratio/water stress
LEA 2	MYBCORE	87	(-)	CNGTTR	S000176	Dehydratio/water stress
LEA 2	MYBCORE	275	(-)	CNGTTR	S000176	Dehydratio/water stress
LEA 2	MYBCORE	417	(-)	CNGTTR	S000176	Dehydratio/water stress
LEA 2	MYBCORE	562	(+)	CNGTTR	S000176	Dehydratio/water stress
LEA 2	MYBCORE	232	(-)	CNGTTR	S000176	Dehydratio/water stress
LEA 2	MYBCORE	268	(-)	CNGTTR	S000176	Dehydratio/water stress
LEA 2	MYBCORE	386	(+)	CNGTTR	S000176	Dehydratio/water stress
LEA 2	MYBCORE	10	(-)	CNGTTR	S000176	Dehydratio/water stress
LEA 2	MYBCORE	63	(-)	CNGTTR	S000176	Dehydratio/water stress
LEA 2	MYBCORE	174	(+)	CNGTTR	S000176	Dehydratio/water stress
LEA 2	MYBCORE	243	(+)	CNGTTR	S000176	Dehydratio/water stress
LEA 2	ABRELATERD1	438	(-)	ACGTG	S000414	ABA responsive complex
LEA 2	BOXLCOREDCPAL	689	(+)	ACCWWCC	S000492	MYB responsive
LEA 2	MYB1AT	369	(+)	WAACCA	S000408	MYB recognition site
LEA 2	MYBCORE	579	(-)	CNGTTR	S000176	Dehydratio/water stress
LEA 2	MYBCORE	675	(+)	CNGTTR	S000176	Dehydratio/water stress
LEA 2	MYBCORE	123	(-)	CNGTTR	S000176	Dehydratio/water stress
LEA 2	MYB1AT	327	(+)	WAACCA	S000408	MYB recognition site
LEA 2	ABRELATERD1	439	(+)	ACGTG	S000414	ABA responsive complex
LEA 2	ABRELATERD1	464	(+)	ACGTG	S000414	ABA responsive complex
LEA 2	ABRELATERD1	409	(+)	ACGTG	S000414	ABA responsive complex
LEA 2	ABRELATERD1	429	(-)	ACGTG	S000414	ABA responsive complex
LEA 2	ABRELATERD1	430	(+)	ACGTG	S000414	ABA responsive complex
LEA 2	ABRELATERD1	277	(+)	ACGTG	S000414	ABA responsive complex
LEA 2	ABRELATERD1	183	(+)	ACGTG	S000414	ABA responsive complex
LEA 2	ABRELATERD1	192	(+)	ACGTG	S000414	ABA responsive complex
LEA 2	ABRELATERD1	206	(-)	ACGTG	S000414	ABA responsive complex
LEA 2	ABRELATERD1	402	(+)	ACGTG	S000414	ABA responsive complex
LEA 2	ABRELATERD1	493	(-)	ACGTG	S000414	ABA responsive complex
LEA 2	ABRELATERD1	494	(+)	ACGTG	S000414	ABA responsive complex
LEA 2	ABRELATERD1	590	(-)	ACGTG	S000414	ABA responsive complex
LEA 2	ABRELATERD1	96	(-)	ACGTG	S000414	ABA responsive complex
LEA 2	ABRELATERD1	97	(+)	ACGTG	S000414	ABA responsive complex
LEA 2	ABRELATERD1	388	(+)	ACGTG	S000414	ABA responsive complex
LEA 2	ABRELATERD1	1036	(+)	ACGTG	S000414	ABA responsive complex
LEA 2	ABRELATERD1	467	(+)	ACGTG	S000414	ABA responsive complex
LEA 2	ABRELATERD1	592	(+)	ACGTG	S000414	ABA responsive complex
LEA 2	ABRELATERD1	370	(-)	ACGTG	S000414	ABA responsive complex
LEA 2	ABRELATERD1	371	(+)	ACGTG	S000414	ABA responsive complex
LEA 2	ABRELATERD1	913	(+)	ACGTG	S000414	ABA responsive complex
LEA 2	ABRELATERD1	1168	(-)	ACGTG	S000414	ABA responsive complex
LEA 2	ABRELATERD1	597	(-)	ACGTG	S000414	ABA responsive complex
LEA 2	ABRELATERD1	192	(+)	ACGTG	S000414	ABA responsive complex
LEA 2	ABRELATERD1	183	(+)	ACGTG	S000414	ABA responsive complex
LEA 2	ASF1MOTIFCAMV	113	(-)	TGACG	S000024	Abiotic and biotic stress
LEA 2	ASF1MOTIFCAMV	363	(+)	TGACG	S000024	Abiotic and biotic stress
LEA 2	ASF1MOTIFCAMV	366	(-)	TGACG	S000024	Abiotic and biotic stress
LEA 2	ASF1MOTIFCAMV	397	(-)	TGACG	S000024	Abiotic and biotic stress
LEA 2	ASF1MOTIFCAMV	339	(-)	TGACG	S000024	Abiotic and biotic stress
LEA 2	ASF1MOTIFCAMV	520	(+)	TGACG	S000024	Abiotic and biotic stress
LEA 2	ASF1MOTIFCAMV	525	(-)	TGACG	S000024	Abiotic and biotic stress
LEA 2	ASF1MOTIFCAMV	28	(-)	TGACG	S000024	Abiotic and biotic stress
LEA 2	ASF1MOTIFCAMV	163	(-)	TGACG	S000024	Abiotic and biotic stress
LEA 2	ASF1MOTIFCAMV	181	(-)	TGACG	S000024	Abiotic and biotic stress
LEA 2	ASF1MOTIFCAMV	5	(-)	TGACG	S000024	Abiotic and biotic stress
LEA 2	ASF1MOTIFCAMV	379	(-)	TGACG	S000024	Abiotic and biotic stress
LEA 2	ASF1MOTIFCAMV	156	(-)	TGACG	S000024	Abiotic and biotic stress
LEA 2	ASF1MOTIFCAMV	61	(+)	TGACG	S000024	Abiotic and biotic stress
LEA 2	ASF1MOTIFCAMV	566	(+)	TGACG	S000024	Abiotic and biotic stress
LEA 2	ASF1MOTIFCAMV	434	(-)	TGACG	S000024	Abiotic and biotic stress
LEA 2	ASF1MOTIFCAMV	521	(-)	TGACG	S000024	Abiotic and biotic stress
LEA 2	ASF1MOTIFCAMV	107	(+)	TGACG	S000024	Abiotic and biotic stress
LEA 2	BOXLCOREDCPAL	41	(+)	ACCWWCC	S000492	MYB responsive
LEA 2	BOXLCOREDCPAL	76	(+)	ACCWWCC	S000492	MYB responsive
LEA 2	BOXLCOREDCPAL	245	(+)	ACCWWCC	S000492	MYB responsive
LEA 2	BOXLCOREDCPAL	271	(-)	ACCWWCC	S000492	MYB responsive
LEA 2	BOXLCOREDCPAL	436	(-)	ACCWWCC	S000492	MYB responsive
LEA 2	BOXLCOREDCPAL	54	(+)	ACCWWCC	S000492	MYB responsive
LEA 2	BOXLCOREDCPAL	58	(+)	ACCWWCC	S000492	MYB responsive
LEA 2	BOXLCOREDCPAL	339	(-)	ACCWWCC	S000492	MYB responsive
LEA 2	BOXLCOREDCPAL	63	(+)	ACCWWCC	S000492	MYB responsive
LEA 2	BOXLCOREDCPAL	448	(-)	ACCWWCC	S000492	MYB responsive
LEA 2	BOXLCOREDCPAL	47	(+)	ACCWWCC	S000492	MYB responsive
LEA 2	BOXLCOREDCPAL	245	(+)	ACCWWCC	S000492	MYB responsive
LEA 2	BOXLCOREDCPAL	53	(+)	ACCWWCC	S000492	MYB responsive
LEA 2	BOXLCOREDCPAL	431	(-)	ACCWWCC	S000492	MYB responsive
LEA 2	BOXLCOREDCPAL	233	(+)	ACCWWCC	S000492	MYB responsive
LEA 2	BOXLCOREDCPAL	291	(+)	ACCWWCC	S000492	MYB responsive
LEA 2	BOXLCOREDCPAL	585	(-)	ACCWWCC	S000492	MYB responsive
LEA 2	BOXLCOREDCPAL	288	(-)	ACCWWCC	S000492	MYB responsive
LEA 2	BOXLCOREDCPAL	355	(-)	ACCWWCC	S000492	MYB responsive
LEA 2	BOXLCOREDCPAL	427	(-)	ACCWWCC	S000492	MYB responsive
LEA 2	BOXLCOREDCPAL	467	(-)	ACCWWCC	S000492	MYB responsive
LEA 2	BOXLCOREDCPAL	77	(+)	ACCWWCC	S000492	MYB responsive
LEA 2	BOXLCOREDCPAL	322	(+)	ACCWWCC	S000492	MYB responsive
LEA 2	BOXLCOREDCPAL	391	(-)	ACCWWCC	S000492	MYB responsive
LEA 2	BOXLCOREDCPAL	233	(+)	ACCWWCC	S000492	MYB responsive
LEA 2	BOXLCOREDCPAL	145	(+)	ACCWWCC	S000492	MYB responsive
LEA 2	BOXLCOREDCPAL	322	(+)	ACCWWCC	S000492	MYB responsive
LEA 2	BOXLCOREDCPAL	547	(-)	ACCWWCC	S000492	MYB responsive
LEA 2	BOXLCOREDCPAL	388	(-)	ACCWWCC	S000492	MYB responsive
LEA 2	BOXLCOREDCPAL	291	(+)	ACCWWCC	S000492	MYB responsive
LEA 2	BOXLCOREDCPAL	68	(+)	ACCWWCC	S000492	MYB responsive
LEA 2	BOXLCOREDCPAL	585	(-)	ACCWWCC	S000492	MYB responsive
LEA 2	BOXLCOREDCPAL	114	(+)	ACCWWCC	S000492	MYB responsive
LEA 2	BOXLCOREDCPAL	391	(-)	ACCWWCC	S000492	MYB responsive
LEA 2	BOXLCOREDCPAL	145	(+)	ACCWWCC	S000492	MYB responsive
LEA 2	CBFHV	122	(+)	RYCGAC	S000497	dehydration-responsive element
LEA 2	CBFHV	496	(+)	RYCGAC	S000497	dehydration-responsive element
LEA 2	CBFHV	264	(-)	RYCGAC	S000497	dehydration-responsive element
LEA 2	CBFHV	264	(+)	RYCGAC	S000497	dehydration-responsive element
LEA 2	CBFHV	172	(-)	RYCGAC	S000497	dehydration-responsive element
LEA 2	CBFHV	172	(+)	RYCGAC	S000497	dehydration-responsive element
LEA 2	CBFHV	184	(+)	RYCGAC	S000497	dehydration-responsive element
LEA 2	CBFHV	3	(-)	RYCGAC	S000497	dehydration-responsive element
LEA 2	CBFHV	411	(-)	RYCGAC	S000497	dehydration-responsive element
LEA 2	CBFHV	801	(+)	RYCGAC	S000497	dehydration-responsive element
LEA 2	CBFHV	13	(+)	RYCGAC	S000497	dehydration-responsive element
LEA 2	CBFHV	312	(+)	RYCGAC	S000497	dehydration-responsive element
LEA 2	CBFHV	622	(-)	RYCGAC	S000497	dehydration-responsive element
LEA 2	CBFHV	622	(+)	RYCGAC	S000497	dehydration-responsive element
LEA 2	CBFHV	450	(+)	RYCGAC	S000497	dehydration-responsive element
LEA 2	CBFHV	565	(-)	RYCGAC	S000497	dehydration-responsive element
LEA 2	CBFHV	349	(+)	RYCGAC	S000497	dehydration-responsive element
LEA 2	CBFHV	848	(+)	RYCGAC	S000497	dehydration-responsive element
LEA 2	CBFHV	1007	(+)	RYCGAC	S000497	dehydration-responsive element
LEA 2	CBFHV	288	(+)	RYCGAC	S000497	dehydration-responsive element
LEA 2	CBFHV	474	(-)	RYCGAC	S000497	dehydration-responsive element
LEA 2	CBFHV	474	(+)	RYCGAC	S000497	dehydration-responsive element
LEA 2	CBFHV	215	(-)	RYCGAC	S000497	dehydration-responsive element
LEA 2	CBFHV	462	(-)	RYCGAC	S000497	dehydration-responsive element
LEA 2	CBFHV	671	(-)	RYCGAC	S000497	dehydration-responsive element
LEA 2	CBFHV	175	(-)	RYCGAC	S000497	dehydration-responsive element
LEA 2	CBFHV	172	(-)	RYCGAC	S000497	dehydration-responsive element
LEA 2	CBFHV	172	(+)	RYCGAC	S000497	dehydration-responsive element
LEA 2	CBFHV	190	(+)	RYCGAC	S000497	dehydration-responsive element
LEA 2	LTRECOREATCOR15	585	(-)	CCGAC	S000153	necessary for cold- or drought
LEA 2	LTRECOREATCOR15	228	(+)	CCGAC	S000153	necessary for cold- or drought
LEA 2	LTRECOREATCOR15	3	(-)	CCGAC	S000153	necessary for cold- or drought
LEA 2	LTRECOREATCOR15	33	(-)	CCGAC	S000153	necessary for cold- or drought
LEA 2	LTRECOREATCOR15	161	(+)	CCGAC	S000153	necessary for cold- or drought
LEA 2	LTRECOREATCOR15	451	(-)	CCGAC	S000153	necessary for cold- or drought
LEA 2	LTRECOREATCOR15	269	(+)	CCGAC	S000153	necessary for cold- or drought
LEA 2	LTRECOREATCOR15	528	(+)	CCGAC	S000153	necessary for cold- or drought
LEA 2	LTRECOREATCOR15	270	(-)	CCGAC	S000153	necessary for cold- or drought
LEA 2	MYB1AT	448	(+)	WAACCA	S000408	MYB recognition site
LEA 2	MYB1AT	513	(-)	WAACCA	S000408	MYB recognition site
LEA 2	MYB1AT	75	(+)	WAACCA	S000408	MYB recognition site
LEA 2	MYB1AT	724	(-)	WAACCA	S000408	MYB recognition site
LEA 2	MYB1AT	86	(+)	WAACCA	S000408	MYB recognition site
LEA 2	MYB1AT	192	(+)	WAACCA	S000408	MYB recognition site
LEA 2	MYB1AT	402	(-)	WAACCA	S000408	MYB recognition site
LEA 2	MYB1AT	843	(+)	WAACCA	S000408	MYB recognition site
LEA 2	MYB1AT	464	(-)	WAACCA	S000408	MYB recognition site
LEA 2	MYB1AT	22	(+)	WAACCA	S000408	MYB recognition site
LEA 2	MYB1AT	61	(+)	WAACCA	S000408	MYB recognition site
LEA 2	MYB1AT	618	(+)	WAACCA	S000408	MYB recognition site
LEA 2	MYB1AT	707	(-)	WAACCA	S000408	MYB recognition site
LEA 2	MYB1AT	142	(-)	WAACCA	S000408	MYB recognition site
LEA 2	MYB1AT	194	(+)	WAACCA	S000408	MYB recognition site
LEA 2	MYB1AT	22	(+)	WAACCA	S000408	MYB recognition site
LEA 2	MYB1AT	373	(-)	WAACCA	S000408	MYB recognition site
LEA 2	MYB1AT	192	(+)	WAACCA	S000408	MYB recognition site
LEA 2	MYB1AT	402	(-)	WAACCA	S000408	MYB recognition site
LEA 2	MYB1AT	145	(-)	WAACCA	S000408	MYB recognition site
LEA 2	MYB1AT	161	(-)	WAACCA	S000408	MYB recognition site
LEA 2	MYB1AT	514	(-)	WAACCA	S000408	MYB recognition site
LEA 2	MYB1AT	675	(-)	WAACCA	S000408	MYB recognition site
LEA 2	MYBCORE	478	(-)	CNGTTR	S000176	Dehydratio/water stress
LEA 2	MYBCORE	654	(-)	CNGTTR	S000176	Dehydratio/water stress
LEA 2	MYBCORE	1060	(-)	CNGTTR	S000176	Dehydratio/water stress
LEA 2	MYBCORE	270	(+)	CNGTTR	S000176	Dehydratio/water stress
LEA 2	MYBCORE	516	(-)	CNGTTR	S000176	Dehydratio/water stress
LEA 2	MYBCORE	10	(-)	CNGTTR	S000176	Dehydratio/water stress
LEA 2	MYBCORE	161	(+)	CNGTTR	S000176	Dehydratio/water stress
LEA 2	MYBCORE	198	(+)	CNGTTR	S000176	Dehydratio/water stress
LEA 2	MYBCORE	594	(-)	CNGTTR	S000176	Dehydratio/water stress
LEA 2	MYBCORE	7	(+)	CNGTTR	S000176	Dehydratio/water stress
LEA 2	MYBCORE	102	(-)	CNGTTR	S000176	Dehydratio/water stress
LEA 2	MYBCORE	666	(+)	CNGTTR	S000176	Dehydratio/water stress
LEA 2	MYBCORE	129	(+)	CNGTTR	S000176	Dehydratio/water stress
LEA 2	MYBCORE	572	(-)	CNGTTR	S000176	Dehydratio/water stress
LEA 2	MYBCORE	598	(+)	CNGTTR	S000176	Dehydratio/water stress
LEA 2	MYBCORE	122	(+)	CNGTTR	S000176	Dehydratio/water stress
LEA 2	MYBCORE	119	(+)	CNGTTR	S000176	Dehydratio/water stress
LEA 2	MYBCORE	306	(-)	CNGTTR	S000176	Dehydratio/water stress
LEA 2	MYBCORE	350	(+)	CNGTTR	S000176	Dehydratio/water stress
LEA 2	MYBCORE	521	(+)	CNGTTR	S000176	Dehydratio/water stress
LEA 2	MYBCORE	612	(-)	CNGTTR	S000176	Dehydratio/water stress
LEA 2	MYBCORE	521	(+)	CNGTTR	S000176	Dehydratio/water stress
LEA 2	MYBCORE	612	(-)	CNGTTR	S000176	Dehydratio/water stress
LEA 2	MYBCORE	31	(-)	CNGTTR	S000176	Dehydratio/water stress
LEA 2	MYBCORE	244	(-)	CNGTTR	S000176	Dehydratio/water stress
LEA 2	MYBCORE	38	(-)	CNGTTR	S000176	Dehydratio/water stress
LEA 2	MYBCORE	61	(-)	CNGTTR	S000176	Dehydratio/water stress
LEA 2	MYBCORE	96	(-)	CNGTTR	S000176	Dehydratio/water stress
LEA 2	MYBCORE	107	(-)	CNGTTR	S000176	Dehydratio/water stress
LEA 2	MYBCORE	174	(-)	CNGTTR	S000176	Dehydratio/water stress
LEA 2	MYBCORE	511	(-)	CNGTTR	S000176	Dehydratio/water stress
LEA 2	MYBCORE	538	(-)	CNGTTR	S000176	Dehydratio/water stress
LEA 2	MYBCORE	652	(+)	CNGTTR	S000176	Dehydratio/water stress
LEA 2	MYBCORE	311	(+)	CNGTTR	S000176	Dehydratio/water stress
LEA 2	MYBCORE	451	(+)	CNGTTR	S000176	Dehydratio/water stress
LEA 2	MYBCORE	291	(-)	CNGTTR	S000176	Dehydratio/water stress
LEA 2	MYBCORE	491	(+)	CNGTTR	S000176	Dehydratio/water stress
LEA 2	MYBCORE	485	(-)	CNGTTR	S000176	Dehydratio/water stress
LEA 2	MYBCORE	125	(-)	CNGTTR	S000176	Dehydratio/water stress
LEA 2	MYBCORE	240	(+)	CNGTTR	S000176	Dehydratio/water stress
LEA 2	MYBCORE	387	(-)	CNGTTR	S000176	Dehydratio/water stress
LEA 2	MYBCORE	300	(+)	CNGTTR	S000176	Dehydratio/water stress
LEA 2	MYBCORE	398	(-)	CNGTTR	S000176	Dehydratio/water stress
LEA 2	MYBCORE	10	(-)	CNGTTR	S000176	Dehydratio/water stress
LEA 2	MYBCORE	63	(-)	CNGTTR	S000176	Dehydratio/water stress
LEA 2	MYBCORE	174	(+)	CNGTTR	S000176	Dehydratio/water stress
LEA 2	MYBCORE	243	(+)	CNGTTR	S000176	Dehydratio/water stress
LEA 2	MYBCORE	579	(-)	CNGTTR	S000176	Dehydratio/water stress
LEA 2	MYBCORE	675	(+)	CNGTTR	S000176	Dehydratio/water stress
LEA 2	MYBCORE	39	(+)	CNGTTR	S000176	Dehydratio/water stress
LEA 2	MYBCORE	78	(+)	CNGTTR	S000176	Dehydratio/water stress
LEA 2	MYBCORE	188	(-)	CNGTTR	S000176	Dehydratio/water stress
LEA 2	MYBCORE	222	(+)	CNGTTR	S000176	Dehydratio/water stress
LEA 2	MYBCORE	453	(+)	CNGTTR	S000176	Dehydratio/water stress
LEA 2	MYBCORE	514	(+)	CNGTTR	S000176	Dehydratio/water stress
LEA 2	MYBCORE	102	(-)	CNGTTR	S000176	Dehydratio/water stress
LEA 2	MYBCORE	666	(+)	CNGTTR	S000176	Dehydratio/water stress
LEA 2	MYBCORE	162	(+)	CNGTTR	S000176	Dehydratio/water stress
LEA 2	MYBCORE	180	(+)	CNGTTR	S000176	Dehydratio/water stress
LEA 2	MYBCORE	535	(-)	CNGTTR	S000176	Dehydratio/water stress
LEA 2	MYBCORE	521	(+)	CNGTTR	S000176	Dehydratio/water stress
LEA 2	MYBCORE	612	(-)	CNGTTR	S000176	Dehydratio/water stress
LEA 2	MYBCORE	618	(+)	CNGTTR	S000176	Dehydratio/water stress
LEA 2	MYBCORE	119	(+)	CNGTTR	S000176	Dehydratio/water stress
LEA 2	MYBCORE	347	(+)	CNGTTR	S000176	Dehydratio/water stress
LEA 2	MYBCORE	28	(-)	CNGTTR	S000176	Dehydratio/water stress
LEA 2	MYBCORE	96	(-)	CNGTTR	S000176	Dehydratio/water stress
LEA 2	MYBCORE	118	(-)	CNGTTR	S000176	Dehydratio/water stress
LEA 2	MYBCORE	219	(+)	CNGTTR	S000176	Dehydratio/water stress
LEA 2	MYBCORE	278	(-)	CNGTTR	S000176	Dehydratio/water stress
LEA 2	MYBCORE	572	(-)	CNGTTR	S000176	Dehydratio/water stress
LEA 2	MYBCORE	315	(-)	CNGTTR	S000176	Dehydratio/water stress
LEA 2	MYBCORE	306	(-)	CNGTTR	S000176	Dehydratio/water stress
LEA 2	MYBCORE	350	(+)	CNGTTR	S000176	Dehydratio/water stress
LEA 2	MYBCORE	291	(-)	CNGTTR	S000176	Dehydratio/water stress
LEA 2	MYBCORE	491	(+)	CNGTTR	S000176	Dehydratio/water stress
LEA 2	MYBCORE	90	(+)	CNGTTR	S000176	Dehydratio/water stress
LEA 2	MYBCORE	357	(-)	CNGTTR	S000176	Dehydratio/water stress
LEA 2	MYBCORE	463	(-)	CNGTTR	S000176	Dehydratio/water stress
LEA 2	MYBCORE	466	(+)	CNGTTR	S000176	Dehydratio/water stress
LEA 2	MYBCORE	539	(+)	CNGTTR	S000176	Dehydratio/water stress
LEA 2	MYBCORE	219	(+)	CNGTTR	S000176	Dehydratio/water stress
LEA 2	MYBCORE	232	(-)	CNGTTR	S000176	Dehydratio/water stress
LEA 2	MYBCORE	408	(-)	CNGTTR	S000176	Dehydratio/water stress
LEA 2	MYBCORE	488	(+)	CNGTTR	S000176	Dehydratio/water stress
LEA 2	MYBCORE	589	(+)	CNGTTR	S000176	Dehydratio/water stress
LEA 2	MYBCORE	306	(-)	CNGTTR	S000176	Dehydratio/water stress
LEA 2	MYBCORE	350	(+)	CNGTTR	S000176	Dehydratio/water stress
LEA 2	MYBCORE	28	(-)	CNGTTR	S000176	Dehydratio/water stress
LEA 2	MYBCORE	35	(+)	CNGTTR	S000176	Dehydratio/water stress
LEA 2	MYBCORE	114	(-)	CNGTTR	S000176	Dehydratio/water stress
LEA 2	MYBCORE	177	(+)	CNGTTR	S000176	Dehydratio/water stress
LEA 2	MYBCORE	525	(-)	CNGTTR	S000176	Dehydratio/water stress
LEA 2	MYBCORE	597	(+)	CNGTTR	S000176	Dehydratio/water stress
LEA 2	MYBCORE	629	(+)	CNGTTR	S000176	Dehydratio/water stress
LEA 2	MYBCORE	737	(-)	CNGTTR	S000176	Dehydratio/water stress
LEA 2	MYBCORE	733	(-)	CNGTTR	S000176	Dehydratio/water stress
LEA 2	ABRELATERD1	96	(-)	ACGTG	S000414	ABA responsive complex
LEA 2	ABRELATERD1	97	(+)	ACGTG	S000414	ABA responsive complex
LEA 2	ABRELATERD1	370	(+)	ACGTG	S000414	ABA responsive complex
LEA 2	ABREOSRAB1	666	(+)	ACGTSSSC	S000012	ABA responsive complex
LEA 2	ABREOSRAB1	501	(-)	ACGTSSSC	S000012	ABA responsive complex
LEA 2	ABREOSRAB1	85	(-)	ACGTSSSC	S000012	ABA responsive complex
LEA 2	ABREOSRAB1	251	(+)	ACGTSSSC	S000012	ABA responsive complex
LEA 2	ABREOSRAB1	85	(-)	ACGTSSSC	S000012	ABA responsive complex
LEA 2	ABREOSRAB1	398	(-)	ACGTSSSC	S000012	ABA responsive complex
LEA 2	ABREOSRAB1	402	(+)	ACGTSSSC	S000012	ABA responsive complex
LEA 2	ASF1MOTIFCAMV	590	(-)	TGACG	S000024	Abiotic and biotic stress
LEA 2	ASF1MOTIFCAMV	250	(-)	TGACG	S000024	Abiotic and biotic stress
LEA 2	ASF1MOTIFCAMV	437	(+)	TGACG	S000024	Abiotic and biotic stress
LEA 2	ASF1MOTIFCAMV	583	(+)	TGACG	S000024	Abiotic and biotic stress
LEA 2	ASF1MOTIFCAMV	299	(-)	TGACG	S000024	Abiotic and biotic stress
LEA 2	ASF1MOTIFCAMV	700	(+)	TGACG	S000024	Abiotic and biotic stress
LEA 2	ASF1MOTIFCAMV	725	(-)	TGACG	S000024	Abiotic and biotic stress
LEA 2	BOXLCOREDCPAL	114	(+)	ACCWWCC	S000492	MYB responsive
LEA 2	BOXLCOREDCPAL	391	(-)	ACCWWCC	S000492	MYB responsive
LEA 2	BOXLCOREDCPAL	144	(+)	ACCWWCC	S000492	MYB responsive
LEA 2	BOXLCOREDCPAL	145	(-)	ACCWWCC	S000492	MYB responsive
LEA 2	BOXLCOREDCPAL	495	(-)	ACCWWCC	S000492	MYB responsive
LEA 2	BOXLCOREDCPAL	63	(+)	ACCWWCC	S000492	MYB responsive
LEA 2	BOXLCOREDCPAL	448	(-)	ACCWWCC	S000492	MYB responsive
LEA 2	BOXLCOREDCPAL	559	(-)	ACCWWCC	S000492	MYB responsive
LEA 2	BOXLCOREDCPAL	105	(+)	ACCWWCC	S000492	MYB responsive
LEA 2	BOXLCOREDCPAL	1260	(+)	ACCWWCC	S000492	MYB responsive
LEA 2	BOXLCOREDCPAL	291	(+)	ACCWWCC	S000492	MYB responsive
LEA 2	BOXLCOREDCPAL	233	(+)	ACCWWCC	S000492	MYB responsive
LEA 2	BOXLCOREDCPAL	331	(+)	ACCWWCC	S000492	MYB responsive
LEA 2	BOXLCOREDCPAL	442	(-)	ACCWWCC	S000492	MYB responsive
LEA 2	BOXLCOREDCPAL	559	(-)	ACCWWCC	S000492	MYB responsive
LEA 2	BOXLCOREDCPAL	146	(+)	ACCWWCC	S000492	MYB responsive
LEA 2	BOXLCOREDCPAL	312	(-)	ACCWWCC	S000492	MYB responsive
LEA 2	BOXLCOREDCPAL	64	(+)	ACCWWCC	S000492	MYB responsive
LEA 2	BOXLCOREDCPAL	488	(-)	ACCWWCC	S000492	MYB responsive
LEA 2	BOXLCOREDCPAL	489	(-)	ACCWWCC	S000492	MYB responsive
LEA 2	CBFHV	361	(-)	RYCGAC	S000497	dehydration-responsive element
LEA 2	CBFHV	446	(-)	RYCGAC	S000497	dehydration-responsive element
LEA 2	CBFHV	446	(+)	RYCGAC	S000497	dehydration-responsive element
LEA 2	CBFHV	76	(-)	RYCGAC	S000497	dehydration-responsive element
LEA 2	CBFHV	677	(-)	RYCGAC	S000497	dehydration-responsive element
LEA 2	CBFHV	677	(+)	RYCGAC	S000497	dehydration-responsive element
LEA 2	CBFHV	1013	(-)	RYCGAC	S000497	dehydration-responsive element
LEA 2	CBFHV	108	(-)	RYCGAC	S000497	dehydration-responsive element
LEA 2	CBFHV	108	(+)	RYCGAC	S000497	dehydration-responsive element
LEA 2	CBFHV	144	(-)	RYCGAC	S000497	dehydration-responsive element
LEA 2	CBFHV	190	(-)	RYCGAC	S000497	dehydration-responsive element
LEA 2	CBFHV	443	(-)	RYCGAC	S000497	dehydration-responsive element
LEA 2	LTRECOREATCOR15	293	(+)	CCGAC	S000153	necessary for cold- or drought
LEA 2	LTRECOREATCOR15	3	(-)	CCGAC	S000153	necessary for cold- or drought
LEA 2	LTRECOREATCOR15	78	(-)	CCGAC	S000153	necessary for cold- or drought
LEA 2	LTRECOREATCOR15	314	(+)	CCGAC	S000153	necessary for cold- or drought
LEA 2	MYB1AT	448	(+)	WAACCA	S000408	MYB recognition site
LEA 2	MYB1AT	513	(-)	WAACCA	S000408	MYB recognition site
LEA 2	MYB1AT	541	(+)	WAACCA	S000408	MYB recognition site
LEA 2	MYB1AT	142	(-)	WAACCA	S000408	MYB recognition site
LEA 2	MYB1AT	61	(+)	WAACCA	S000408	MYB recognition site
LEA 2	MYB1AT	22	(+)	WAACCA	S000408	MYB recognition site
LEA 2	MYB1AT	666	(+)	WAACCA	S000408	MYB recognition site
LEA 2	MYB1AT	61	(+)	WAACCA	S000408	MYB recognition site
LEA 2	MYB1AT	112	(+)	WAACCA	S000408	MYB recognition site
LEA 2	MYB1AT	618	(+)	WAACCA	S000408	MYB recognition site
LEA 2	MYB1AT	377	(+)	WAACCA	S000408	MYB recognition site
LEA 2	MYB1AT	53	(-)	WAACCA	S000408	MYB recognition site
LEA 2	MYBCORE	797	(-)	CNGTTR	S000176	Dehydratio/water stress
LEA 2	MYBCORE	129	(+)	CNGTTR	S000176	Dehydratio/water stress
LEA 2	MYBCORE	315	(-)	CNGTTR	S000176	Dehydratio/water stress
LEA 2	MYBCORE	572	(-)	CNGTTR	S000176	Dehydratio/water stress
LEA 2	MYBCORE	598	(+)	CNGTTR	S000176	Dehydratio/water stress
LEA 2	MYBCORE	387	(+)	CNGTTR	S000176	Dehydratio/water stress
LEA 2	MYBCORE	93	(+)	CNGTTR	S000176	Dehydratio/water stress
LEA 2	MYBCORE	211	(-)	CNGTTR	S000176	Dehydratio/water stress
LEA 2	MYBCORE	846	(-)	CNGTTR	S000176	Dehydratio/water stress
LEA 2	MYBCORE	984	(-)	CNGTTR	S000176	Dehydratio/water stress
LEA 2	MYBCORE	1052	(-)	CNGTTR	S000176	Dehydratio/water stress
LEA 2	MYBCORE	1315	(+)	CNGTTR	S000176	Dehydratio/water stress
LEA 2	MYBCORE	1354	(-)	CNGTTR	S000176	Dehydratio/water stress
LEA 2	MYBCORE	220	(-)	CNGTTR	S000176	Dehydratio/water stress
LEA 2	MYBCORE	343	(+)	CNGTTR	S000176	Dehydratio/water stress
LEA 2	MYBCORE	384	(+)	CNGTTR	S000176	Dehydratio/water stress
LEA 2	MYBCORE	567	(+)	CNGTTR	S000176	Dehydratio/water stress
LEA 2	MYBCORE	649	(+)	CNGTTR	S000176	Dehydratio/water stress
LEA 2	MYBCORE	856	(+)	CNGTTR	S000176	Dehydratio/water stress
LEA 2	MYBCORE	60	(-)	CNGTTR	S000176	Dehydratio/water stress
LEA 2	MYBCORE	219	(+)	CNGTTR	S000176	Dehydratio/water stress
LEA 2	MYBCORE	380	(+)	CNGTTR	S000176	Dehydratio/water stress
LEA 2	MYBCORE	132	(+)	CNGTTR	S000176	Dehydratio/water stress
LEA 2	MYBCORE	306	(-)	CNGTTR	S000176	Dehydratio/water stress
LEA 2	MYBCORE	433	(+)	CNGTTR	S000176	Dehydratio/water stress
LEA 2	MYBCORE	935	(-)	CNGTTR	S000176	Dehydratio/water stress
LEA 2	MYBCORE	484	(+)	CNGTTR	S000176	Dehydratio/water stress
LEA 2	MYBCORE	513	(-)	CNGTTR	S000176	Dehydratio/water stress
LEA 2	MYB1AT	518	(+)	WAACCA	S000408	MYB recognition site
LEA 2	MYBCORE	10	(-)	CNGTTR	S000176	Dehydratio/water stress
LEA 2	MYBCORE	164	(+)	CNGTTR	S000176	Dehydratio/water stress
LEA 2	ABREOSRAB1	414	(-)	ACGTSSSC	S000012	ABA responsive complex
LEA 2	BOXLCOREDCPAL	146	(+)	ACCWWCC	S000492	MYB responsive
LEA 2	CBFHV	443	(+)	RYCGAC	S000497	dehydration-responsive element
LEA 2	CBFHV	264	(-)	RYCGAC	S000497	dehydration-responsive element
LEA 2	MYB1AT	61	(+)	WAACCA	S000408	MYB recognition site
LEA 2	ASF1MOTIFCAMV	229	(+)	TGACG	S000024	Abiotic and biotic stress
LEA 2	ASF1MOTIFCAMV	630	(-)	TGACG	S000024	Abiotic and biotic stress
LEA 2	ASF1MOTIFCAMV	276	(-)	TGACG	S000024	Abiotic and biotic stress
LEA 2	BOXLCOREDCPAL	14	(+)	ACCWWCC	S000492	MYB responsive
LEA 2	BOXLCOREDCPAL	476	(-)	ACCWWCC	S000492	MYB responsive
LEA 2	CBFHV	264	(+)	RYCGAC	S000497	dehydration-responsive element
LEA 2	CBFHV	225	(-)	RYCGAC	S000497	dehydration-responsive element
LEA 2	LTRECOREATCOR15	655	(-)	CCGAC	S000153	necessary for cold- or drought
LEA 2	LTRECOREATCOR15	3	(-)	CCGAC	S000153	necessary for cold- or drought
LEA 2	MYBCORE	597	(-)	CNGTTR	S000176	Dehydratio/water stress
LEA 2	MYBCORE	669	(+)	CNGTTR	S000176	Dehydratio/water stress
LEA 2	MYBCORE	727	(-)	CNGTTR	S000176	Dehydratio/water stress
LEA 2	MYBCORE	323	(+)	CNGTTR	S000176	Dehydratio/water stress
LEA 2	MYBCORE	329	(+)	CNGTTR	S000176	Dehydratio/water stress
LEA 2	MYBCORE	724	(+)	CNGTTR	S000176	Dehydratio/water stress
LEA 2	MYBCORE	68	(-)	CNGTTR	S000176	Dehydratio/water stress
LEA 2	ABREOSRAB1	435	(-)	ACGTSSSC	S000012	ABA responsive complex
LEA 2	ABREOSRAB1	183	(+)	ACGTSSSC	S000012	ABA responsive complex
LEA 2	ABREOSRAB1	192	(+)	ACGTSSSC	S000012	ABA responsive complex
LEA 2	ABREOSRAB1	398	(-)	ACGTSSSC	S000012	ABA responsive complex
LEA 2	ABREOSRAB1	402	(+)	ACGTSSSC	S000012	ABA responsive complex
LEA 2	ABREOSRAB1	508	(-)	ACGTSSSC	S000012	ABA responsive complex
LEA 2	ASF1MOTIFCAMV	627	(-)	TGACG	S000024	Abiotic and biotic stress
LEA 2	ASF1MOTIFCAMV	634	(-)	TGACG	S000024	Abiotic and biotic stress
LEA 2	ASF1MOTIFCAMV	272	(-)	TGACG	S000024	Abiotic and biotic stress
LEA 2	BOXLCOREDCPAL	337	(+)	ACCWWCC	S000492	MYB responsive
LEA 2	BOXLCOREDCPAL	448	(-)	ACCWWCC	S000492	MYB responsive
LEA 2	BOXLCOREDCPAL	212	(+)	ACCWWCC	S000492	MYB responsive
LEA 2	BOXLCOREDCPAL	339	(-)	ACCWWCC	S000492	MYB responsive
LEA 2	BOXLCOREDCPAL	275	(-)	ACCWWCC	S000492	MYB responsive
LEA 2	CBFHV	606	(-)	RYCGAC	S000497	dehydration-responsive element
LEA 2	LTRE1HVBLT49	623	(+)	CCGAAA	S000250	low temperature
LEA 2	LTRE1HVBLT49	35	(-)	CCGAAA	S000250	low temperature
LEA 2	LTRE1HVBLT49	219	(-)	CCGAAA	S000250	low temperature
LEA 2	LTRECOREATCOR15	449	(-)	CCGAC	S000153	necessary for cold- or drought
LEA 2	LTRECOREATCOR15	220	(+)	CCGAC	S000153	necessary for cold- or drought
LEA 2	LTRECOREATCOR15	601	(+)	CCGAC	S000153	necessary for cold- or drought
LEA 2	LTRECOREATCOR15	777	(-)	CCGAC	S000153	necessary for cold- or drought
LEA 2	LTRECOREATCOR15	386	(-)	CCGAC	S000153	necessary for cold- or drought
LEA 2	MYB1AT	112	(+)	WAACCA	S000408	MYB recognition site
LEA 2	MYB1AT	618	(+)	WAACCA	S000408	MYB recognition site
LEA 2	MYB1AT	123	(-)	WAACCA	S000408	MYB recognition site
LEA 2	MYB1AT	742	(-)	WAACCA	S000408	MYB recognition site
LEA 2	MYB1AT	464	(-)	WAACCA	S000408	MYB recognition site
LEA 2	MYB1AT	22	(+)	WAACCA	S000408	MYB recognition site
LEA 2	MYB1AT	11	(+)	WAACCA	S000408	MYB recognition site
LEA 2	MYBCORE	483	(-)	CNGTTR	S000176	Dehydratio/water stress
LEA 2	MYBCORE	598	(+)	CNGTTR	S000176	Dehydratio/water stress
LEA 2	MYBCORE	387	(-)	CNGTTR	S000176	Dehydratio/water stress
LEA 2	MYBCORE	343	(-)	CNGTTR	S000176	Dehydratio/water stress
LEA 2	MYBCORE	529	(-)	CNGTTR	S000176	Dehydratio/water stress
LEA 2	MYBCORE	31	(-)	CNGTTR	S000176	Dehydratio/water stress
LEA 2	MYBCORE	244	(-)	CNGTTR	S000176	Dehydratio/water stress
LEA 2	MYBCORE	148	(+)	CNGTTR	S000176	Dehydratio/water stress
LEA 2	MYBCORE	797	(-)	CNGTTR	S000176	Dehydratio/water stress
LEA 2	MYBCORE	109	(+)	CNGTTR	S000176	Dehydratio/water stress
LEA 2	MYBCORE	247	(-)	CNGTTR	S000176	Dehydratio/water stress
LEA 2	MYBCORE	61	(-)	CNGTTR	S000176	Dehydratio/water stress
LEA 2	MYBCORE	93	(-)	CNGTTR	S000176	Dehydratio/water stress
LEA 2	MYBCORE	480	(-)	CNGTTR	S000176	Dehydratio/water stress
LEA 2	MYBCORE	501	(-)	CNGTTR	S000176	Dehydratio/water stress
LEA 2	MYBCORE	529	(-)	CNGTTR	S000176	Dehydratio/water stress
LEA 2	MYBCORE	510	(-)	CNGTTR	S000176	Dehydratio/water stress
LEA 2	MYBCORE	534	(-)	CNGTTR	S000176	Dehydratio/water stress
LEA 2	MYBCORE	484	(+)	CNGTTR	S000176	Dehydratio/water stress
LEA 2	MYBCORE	513	(-)	CNGTTR	S000176	Dehydratio/water stress
LEA 2	MYBCORE	601	(+)	CNGTTR	S000176	Dehydratio/water stress
LEA 2	MYBCORE	140	(+)	CNGTTR	S000176	Dehydratio/water stress
LEA 2	MYBCORE	681	(-)	CNGTTR	S000176	Dehydratio/water stress
LEA 2	MYBCORE	732	(+)	CNGTTR	S000176	Dehydratio/water stress
LEA 2	MYB1AT	54	(+)	WAACCA	S000408	MYB recognition site
LEA 2	ABREOSRAB1	383	(-)	ACGTSSSC	S000012	ABA responsive complex
LEA 2	ABREOSRAB1	463	(-)	ACGTSSSC	S000012	ABA responsive complex
LEA 2	ABREOSRAB1	588	(-)	ACGTSSSC	S000012	ABA responsive complex
LEA 2	ABREOSRAB1	192	(+)	ACGTSSSC	S000012	ABA responsive complex
LEA 2	ABREOSRAB1	183	(+)	ACGTSSSC	S000012	ABA responsive complex
LEA 2	ABRERATCAL	579	(+)	MACGYGB	S000507	ABA responsive complex
LEA 2	ABRERATCAL	500	(-)	MACGYGB	S000507	ABA responsive complex
LEA 2	ABRERATCAL	52	(+)	MACGYGB	S000507	ABA responsive complex
LEA 2	ABRERATCAL	53	(-)	MACGYGB	S000507	ABA responsive complex
LEA 2	ABRERATCAL	551	(+)	MACGYGB	S000507	ABA responsive complex
LEA 2	ABRERATCAL	96	(+)	MACGYGB	S000507	ABA responsive complex
LEA 2	ABRERATCAL	168	(-)	MACGYGB	S000507	ABA responsive complex
LEA 2	ABRERATCAL	433	(-)	MACGYGB	S000507	ABA responsive complex
LEA 2	ASF1MOTIFCAMV	163	(-)	TGACG	S000024	Abiotic and biotic stress
LEA 2	ASF1MOTIFCAMV	181	(-)	TGACG	S000024	Abiotic and biotic stress
LEA 2	ASF1MOTIFCAMV	626	(+)	TGACG	S000024	Abiotic and biotic stress
LEA 2	ASF1MOTIFCAMV	186	(-)	TGACG	S000024	Abiotic and biotic stress
LEA 2	BOXLCOREDCPAL	513	(-)	ACCWWCC	S000492	MYB responsive
LEA 2	BOXLCOREDCPAL	334	(+)	ACCWWCC	S000492	MYB responsive
LEA 2	BOXLCOREDCPAL	53	(+)	ACCWWCC	S000492	MYB responsive
LEA 2	BOXLCOREDCPAL	144	(+)	ACCWWCC	S000492	MYB responsive
LEA 2	BOXLCOREDCPAL	337	(+)	ACCWWCC	S000492	MYB responsive
LEA 2	BOXLCOREDCPAL	448	(-)	ACCWWCC	S000492	MYB responsive
LEA 2	BOXLCOREDCPAL	218	(+)	ACCWWCC	S000492	MYB responsive
LEA 2	BOXLCOREDCPAL	41	(+)	ACCWWCC	S000492	MYB responsive
LEA 2	LTRE1HVBLT49	604	(-)	CCGAAA	S000250	low temperature
LEA 2	LTRE1HVBLT49	231	(-)	CCGAAA	S000250	low temperature
LEA 2	LTRE1HVBLT49	596	(-)	CCGAAA	S000250	low temperature
LEA 2	LTRE1HVBLT49	292	(-)	CCGAAA	S000250	low temperature
LEA 2	LTRE1HVBLT49	443	(-)	CCGAAA	S000250	low temperature
LEA 2	LTRE1HVBLT49	604	(-)	CCGAAA	S000250	low temperature
LEA 2	LTRE1HVBLT49	759	(+)	CCGAAA	S000250	low temperature
LEA 2	LTRE1HVBLT49	263	(+)	CCGAAA	S000250	low temperature
LEA 2	LTRE1HVBLT49	445	(-)	CCGAAA	S000250	low temperature
LEA 2	LTRE1HVBLT49	495	(+)	CCGAAA	S000250	low temperature
LEA 2	LTRE1HVBLT49	956	(-)	CCGAAA	S000250	low temperature
LEA 2	LTRE1HVBLT49	256	(-)	CCGAAA	S000250	low temperature
LEA 2	LTRE1HVBLT49	740	(-)	CCGAAA	S000250	low temperature
LEA 2	LTRECOREATCOR15	40	(-)	CCGAC	S000153	necessary for cold- or drought
LEA 2	LTRECOREATCOR15	52	(-)	CCGAC	S000153	necessary for cold- or drought
LEA 2	MYB1AT	145	(+)	WAACCA	S000408	MYB recognition site
LEA 2	MYB1AT	195	(-)	WAACCA	S000408	MYB recognition site
LEA 2	MYB1AT	103	(+)	WAACCA	S000408	MYB recognition site
LEA 2	MYB1AT	145	(-)	WAACCA	S000408	MYB recognition site
LEA 2	MYB1AT	240	(-)	WAACCA	S000408	MYB recognition site
LEA 2	MYB1AT	87	(-)	WAACCA	S000408	MYB recognition site
LEA 2	MYB1AT	130	(-)	WAACCA	S000408	MYB recognition site
LEA 2	MYBCORE	939	(+)	CNGTTR	S000176	Dehydratio/water stress
LEA 2	MYBCORE	57	(-)	CNGTTR	S000176	Dehydratio/water stress
LEA 2	MYBCORE	478	(-)	CNGTTR	S000176	Dehydratio/water stress
LEA 2	MYBCORE	623	(+)	CNGTTR	S000176	Dehydratio/water stress
LEA 2	MYBCORE	63	(-)	CNGTTR	S000176	Dehydratio/water stress
LEA 2	MYBCORE	391	(-)	CNGTTR	S000176	Dehydratio/water stress
LEA 2	MYBCORE	138	(-)	CNGTTR	S000176	Dehydratio/water stress
LEA 2	MYBCORE	176	(+)	CNGTTR	S000176	Dehydratio/water stress
LEA 2	MYBCORE	632	(+)	CNGTTR	S000176	Dehydratio/water stress
LEA 2	MYBCORE	638	(-)	CNGTTR	S000176	Dehydratio/water stress
LEA 2	MYBCORE	510	(-)	CNGTTR	S000176	Dehydratio/water stress
LEA 2	MYBCORE	534	(-)	CNGTTR	S000176	Dehydratio/water stress
LEA 2	MYBCORE	389	(-)	CNGTTR	S000176	Dehydratio/water stress
LEA 2	MYBCORE	442	(-)	CNGTTR	S000176	Dehydratio/water stress
LEA 2	MYBCORE	372	(+)	CNGTTR	S000176	Dehydratio/water stress
LEA 2	MYBCORE	525	(+)	CNGTTR	S000176	Dehydratio/water stress
LEA 2	MYBCORE	554	(+)	CNGTTR	S000176	Dehydratio/water stress
LEA 2	MYBCORE	313	(-)	CNGTTR	S000176	Dehydratio/water stress
LEA 2	MYBCORE	513	(+)	CNGTTR	S000176	Dehydratio/water stress
LEA 2	MYBCORE	766	(+)	CNGTTR	S000176	Dehydratio/water stress
LEA 2	MYBCORE	785	(-)	CNGTTR	S000176	Dehydratio/water stress
LEA 2	MYBCORE	26	(+)	CNGTTR	S000176	Dehydratio/water stress
LEA 2	MYBCORE	482	(+)	CNGTTR	S000176	Dehydratio/water stress
LEA 2	MYBCORE	488	(-)	CNGTTR	S000176	Dehydratio/water stress
LEA 2	MYBCORE	448	(-)	CNGTTR	S000176	Dehydratio/water stress
LEA 2	MYBCORE	503	(-)	CNGTTR	S000176	Dehydratio/water stress
LEA 2	MYBCORE	258	(+)	CNGTTR	S000176	Dehydratio/water stress
LEA 2	MYBCORE	486	(-)	CNGTTR	S000176	Dehydratio/water stress
LEA 2	MYBCORE	562	(+)	CNGTTR	S000176	Dehydratio/water stress
LEA 2	MYB1AT	8	(+)	WAACCA	S000408	MYB recognition site
LEA 2	MYB1AT	64	(-)	WAACCA	S000408	MYB recognition site
LEA 2	MYB1AT	247	(-)	WAACCA	S000408	MYB recognition site
LEA 2	MYBCORE	918	(-)	CNGTTR	S000176	Dehydratio/water stress
LEA 2	MYBCORE	386	(+)	CNGTTR	S000176	Dehydratio/water stress
LEA 2	ABRERATCAL	158	(+)	MACGYGB	S000507	ABA responsive complex
LEA 2	ABRERATCAL	671	(+)	MACGYGB	S000507	ABA responsive complex
LEA 2	ABRERATCAL	597	(+)	MACGYGB	S000507	ABA responsive complex
LEA 2	ABRERATCAL	149	(+)	MACGYGB	S000507	ABA responsive complex
LEA 2	ABRERATCAL	153	(-)	MACGYGB	S000507	ABA responsive complex
LEA 2	ASF1MOTIFCAMV	379	(+)	TGACG	S000024	Abiotic and biotic stress
LEA 2	BOXLCOREDCPAL	331	(+)	ACCWWCC	S000492	MYB responsive
LEA 2	BOXLCOREDCPAL	442	(-)	ACCWWCC	S000492	MYB responsive
LEA 2	BOXLCOREDCPAL	485	(-)	ACCWWCC	S000492	MYB responsive
LEA 2	LTRE1HVBLT49	347	(-)	CCGAAA	S000250	low temperature
LEA 2	LTRECOREATCOR15	325	(+)	CCGAC	S000153	necessary for cold- or drought
LEA 2	MYB1AT	261	(+)	WAACCA	S000408	MYB recognition site
LEA 2	MYB1AT	555	(+)	WAACCA	S000408	MYB recognition site
LEA 2	MYBCORE	568	(+)	CNGTTR	S000176	Dehydratio/water stress
LEA 2	MYBCORE	595	(-)	CNGTTR	S000176	Dehydratio/water stress
LEA 2	MYBCORE	451	(+)	CNGTTR	S000176	Dehydratio/water stress
LEA 2	MYBCORE	632	(+)	CNGTTR	S000176	Dehydratio/water stress
LEA 2	MYBCORE	646	(+)	CNGTTR	S000176	Dehydratio/water stress
LEA 2	MYBCORE	70	(-)	CNGTTR	S000176	Dehydratio/water stress
LEA 2	MYB1AT	749	(+)	WAACCA	S000408	MYB recognition site
LEA 2	ABRERATCAL	154	(+)	MACGYGB	S000507	ABA responsive complex
LEA 2	ABRERATCAL	471	(-)	MACGYGB	S000507	ABA responsive complex
LEA 2	ABRERATCAL	472	(+)	MACGYGB	S000507	ABA responsive complex
LEA 2	ABRERATCAL	251	(+)	MACGYGB	S000507	ABA responsive complex
LEA 2	ABRERATCAL	434	(+)	MACGYGB	S000507	ABA responsive complex
LEA 2	ASF1MOTIFCAMV	107	(+)	TGACG	S000024	Abiotic and biotic stress
LEA 2	BOXLCOREDCPAL	127	(+)	ACCWWCC	S000492	MYB responsive
LEA 2	BOXLCOREDCPAL	580	(-)	ACCWWCC	S000492	MYB responsive
LEA 2	BOXLCOREDCPAL	291	(+)	ACCWWCC	S000492	MYB responsive
LEA 2	LTRE1HVBLT49	488	(-)	CCGAAA	S000250	low temperature
LEA 2	LTRECOREATCOR15	269	(+)	CCGAC	S000153	necessary for cold- or drought
LEA 2	MYB1AT	264	(+)	WAACCA	S000408	MYB recognition site
LEA 2	MYB1AT	8	(+)	WAACCA	S000408	MYB recognition site
LEA 2	MYBCORE	372	(+)	CNGTTR	S000176	Dehydratio/water stress
LEA 2	MYBCORE	510	(-)	CNGTTR	S000176	Dehydratio/water stress
LEA 2	MYBCORE	740	(+)	CNGTTR	S000176	Dehydratio/water stress
LEA 2	MYBCORE	167	(-)	CNGTTR	S000176	Dehydratio/water stress
LEA 2	MYBCORE	376	(+)	CNGTTR	S000176	Dehydratio/water stress
LEA 2	MYBCORE	552	(+)	CNGTTR	S000176	Dehydratio/water stress
LEA 2	MYB1AT	226	(-)	WAACCA	S000408	MYB recognition site
LEA 2	ASF1MOTIFCAMV	290	(+)	TGACG	S000024	Abiotic and biotic stress
LEA 2	ASF1MOTIFCAMV	87	(+)	TGACG	S000024	Abiotic and biotic stress
LEA 2	ASF1MOTIFCAMV	375	(+)	TGACG	S000024	Abiotic and biotic stress
LEA 2	ASF1MOTIFCAMV	722	(-)	TGACG	S000024	Abiotic and biotic stress
LEA 2	ASF1MOTIFCAMV	70	(-)	TGACG	S000024	Abiotic and biotic stress
LEA 2	ASF1MOTIFCAMV	299	(-)	TGACG	S000024	Abiotic and biotic stress
LEA 2	ASF1MOTIFCAMV	700	(+)	TGACG	S000024	Abiotic and biotic stress
LEA 2	ASF1MOTIFCAMV	725	(-)	TGACG	S000024	Abiotic and biotic stress
LEA 2	ASF1MOTIFCAMV	370	(-)	TGACG	S000024	Abiotic and biotic stress
LEA 2	ASF1MOTIFCAMV	272	(-)	TGACG	S000024	Abiotic and biotic stress
LEA 2	ASF1MOTIFCAMV	703	(-)	TGACG	S000024	Abiotic and biotic stress
LEA 2	ASF1MOTIFCAMV	379	(-)	TGACG	S000024	Abiotic and biotic stress
LEA 2	ASF1MOTIFCAMV	156	(-)	TGACG	S000024	Abiotic and biotic stress
LEA 2	ASF1MOTIFCAMV	73	(-)	TGACG	S000024	Abiotic and biotic stress
LEA 2	ASF1MOTIFCAMV	634	(-)	TGACG	S000024	Abiotic and biotic stress
LEA 2	ASF1MOTIFCAMV	186	(-)	TGACG	S000024	Abiotic and biotic stress
LEA 2	ASF1MOTIFCAMV	379	(+)	TGACG	S000024	Abiotic and biotic stress
LEA 2	ASF1MOTIFCAMV	145	(+)	TGACG	S000024	Abiotic and biotic stress
LEA 2	ASF1MOTIFCAMV	37	(+)	TGACG	S000024	Abiotic and biotic stress
LEA 2	ASF1MOTIFCAMV	189	(-)	TGACG	S000024	Abiotic and biotic stress
LEA 2	ASF1MOTIFCAMV	214	(-)	TGACG	S000024	Abiotic and biotic stress
LEA 2	ASF1MOTIFCAMV	574	(+)	TGACG	S000024	Abiotic and biotic stress
LEA 2	BOXLCOREDCPAL	105	(+)	ACCWWCC	S000492	MYB responsive
LEA 2	BOXLCOREDCPAL	1260	(+)	ACCWWCC	S000492	MYB responsive
LEA 2	BOXLCOREDCPAL	275	(-)	ACCWWCC	S000492	MYB responsive
LEA 2	BOXLCOREDCPAL	513	(-)	ACCWWCC	S000492	MYB responsive
LEA 2	BOXLCOREDCPAL	431	(-)	ACCWWCC	S000492	MYB responsive
LEA 2	BOXLCOREDCPAL	14	(+)	ACCWWCC	S000492	MYB responsive
LEA 2	BOXLCOREDCPAL	747	(+)	ACCWWCC	S000492	MYB responsive
LEA 2	BOXLCOREDCPAL	334	(+)	ACCWWCC	S000492	MYB responsive
LEA 2	BOXLCOREDCPAL	467	(-)	ACCWWCC	S000492	MYB responsive
LEA 2	BOXLCOREDCPAL	334	(+)	ACCWWCC	S000492	MYB responsive
LEA 2	BOXLCOREDCPAL	275	(-)	ACCWWCC	S000492	MYB responsive
LEA 2	BOXLCOREDCPAL	513	(-)	ACCWWCC	S000492	MYB responsive
LEA 2	CBFHV	37	(-)	RYCGAC	S000497	dehydration-responsive element
LEA 2	CBFHV	37	(+)	RYCGAC	S000497	dehydration-responsive element
LEA 2	CBFHV	122	(-)	RYCGAC	S000497	dehydration-responsive element
LEA 2	CBFHV	122	(+)	RYCGAC	S000497	dehydration-responsive element
LEA 2	CBFHV	496	(+)	RYCGAC	S000497	dehydration-responsive element
LEA 2	CBFHV	413	(-)	RYCGAC	S000497	dehydration-responsive element
LEA 2	CBFHV	413	(+)	RYCGAC	S000497	dehydration-responsive element
LEA 2	CBFHV	881	(-)	RYCGAC	S000497	dehydration-responsive element
LEA 2	CBFHV	881	(+)	RYCGAC	S000497	dehydration-responsive element
LEA 2	CBFHV	385	(-)	RYCGAC	S000497	dehydration-responsive element
LEA 2	CBFHV	385	(+)	RYCGAC	S000497	dehydration-responsive element
LEA 2	CBFHV	553	(-)	RYCGAC	S000497	dehydration-responsive element
LEA 2	CBFHV	389	(-)	RYCGAC	S000497	dehydration-responsive element
LEA 2	CBFHV	389	(+)	RYCGAC	S000497	dehydration-responsive element
LEA 2	CBFHV	668	(-)	RYCGAC	S000497	dehydration-responsive element
LEA 2	CBFHV	465	(-)	RYCGAC	S000497	dehydration-responsive element
LEA 2	CBFHV	428	(-)	RYCGAC	S000497	dehydration-responsive element
LEA 2	CBFHV	590	(-)	RYCGAC	S000497	dehydration-responsive element
LEA 2	CBFHV	688	(+)	RYCGAC	S000497	dehydration-responsive element
LEA 2	CBFHV	3	(-)	RYCGAC	S000497	dehydration-responsive element
LEA 2	CBFHV	64	(-)	RYCGAC	S000497	dehydration-responsive element
LEA 2	CBFHV	521	(-)	RYCGAC	S000497	dehydration-responsive element
LEA 2	CBFHV	26	(-)	RYCGAC	S000497	dehydration-responsive element
LEA 2	CBFHV	422	(-)	RYCGAC	S000497	dehydration-responsive element
LEA 2	CBFHV	422	(+)	RYCGAC	S000497	dehydration-responsive element
LEA 2	CBFHV	392	(-)	RYCGAC	S000497	dehydration-responsive element
LEA 2	CBFHV	600	(+)	RYCGAC	S000497	dehydration-responsive element
LEA 2	CBFHV	777	(-)	RYCGAC	S000497	dehydration-responsive element
LEA 2	CBFHV	3	(-)	RYCGAC	S000497	dehydration-responsive element
LEA 2	CBFHV	449	(-)	RYCGAC	S000497	dehydration-responsive element
LEA 2	CBFHV	227	(+)	RYCGAC	S000497	dehydration-responsive element
LEA 2	CBFHV	3	(-)	RYCGAC	S000497	dehydration-responsive element
LEA 2	CBFHV	33	(-)	RYCGAC	S000497	dehydration-responsive element
LEA 2	CBFHV	451	(-)	RYCGAC	S000497	dehydration-responsive element
LEA 2	CBFHV	443	(-)	RYCGAC	S000497	dehydration-responsive element
LEA 2	CBFHV	443	(+)	RYCGAC	S000497	dehydration-responsive element
LEA 2	CBFHV	314	(+)	RYCGAC	S000497	dehydration-responsive element
LEA 2	CBFHV	527	(+)	RYCGAC	S000497	dehydration-responsive element
LEA 2	CBFHV	270	(-)	RYCGAC	S000497	dehydration-responsive element
LEA 2	CBFHV	319	(+)	RYCGAC	S000497	dehydration-responsive element
LEA 2	CBFHV	78	(-)	RYCGAC	S000497	dehydration-responsive element
LEA 2	CBFHV	3	(-)	RYCGAC	S000497	dehydration-responsive element
LEA 2	CBFHV	449	(-)	RYCGAC	S000497	dehydration-responsive element
LEA 2	CBFHV	331	(-)	RYCGAC	S000497	dehydration-responsive element
LEA 2	CBFHV	600	(+)	RYCGAC	S000497	dehydration-responsive element
LEA 2	CBFHV	777	(-)	RYCGAC	S000497	dehydration-responsive element
LEA 2	CBFHV	52	(-)	RYCGAC	S000497	dehydration-responsive element
LEA 2	CBFHV	324	(+)	RYCGAC	S000497	dehydration-responsive element
LEA 2	CBFHV	319	(-)	RYCGAC	S000497	dehydration-responsive element
LEA 2	CBFHV	319	(+)	RYCGAC	S000497	dehydration-responsive element
LEA 2	CBFHV	361	(-)	RYCGAC	S000497	dehydration-responsive element
LEA 2	CBFHV	446	(-)	RYCGAC	S000497	dehydration-responsive element
LEA 2	LTRE1HVBLT49	287	(-)	CCGAAA	S000250	low temperature
LEA 2	LTRE1HVBLT49	377	(+)	CCGAAA	S000250	low temperature
LEA 2	LTRE1HVBLT49	448	(-)	CCGAAA	S000250	low temperature
LEA 2	LTRE1HVBLT49	256	(-)	CCGAAA	S000250	low temperature
LEA 2	LTRE1HVBLT49	124	(-)	CCGAAA	S000250	low temperature
LEA 2	LTRE1HVBLT49	495	(+)	CCGAAA	S000250	low temperature
LEA 2	LTRE1HVBLT49	344	(-)	CCGAAA	S000250	low temperature
LEA 2	LTRE1HVBLT49	485	(-)	CCGAAA	S000250	low temperature
LEA 2	LTRE1HVBLT49	580	(-)	CCGAAA	S000250	low temperature
LEA 2	LTRE1HVBLT49	387	(+)	CCGAAA	S000250	low temperature
LEA 2	LTRE1HVBLT49	347	(-)	CCGAAA	S000250	low temperature
LEA 2	LTRE1HVBLT49	197	(+)	CCGAAA	S000250	low temperature
LEA 2	LTRE1HVBLT49	338	(-)	CCGAAA	S000250	low temperature
LEA 2	LTRE1HVBLT49	347	(-)	CCGAAA	S000250	low temperature
LEA 2	LTRE1HVBLT49	231	(-)	CCGAAA	S000250	low temperature
LEA 2	LTRE1HVBLT49	810	(-)	CCGAAA	S000250	low temperature
LEA 2	LTRE1HVBLT49	443	(-)	CCGAAA	S000250	low temperature
LEA 2	LTRE1HVBLT49	12	(-)	CCGAAA	S000250	low temperature
LEA 2	LTRE1HVBLT49	121	(-)	CCGAAA	S000250	low temperature
LEA 2	LTRE1HVBLT49	555	(+)	CCGAAA	S000250	low temperature
LEA 2	LTRE1HVBLT49	124	(-)	CCGAAA	S000250	low temperature
LEA 2	LTRE1HVBLT49	67	(-)	CCGAAA	S000250	low temperature
LEA 2	LTRE1HVBLT49	377	(+)	CCGAAA	S000250	low temperature
LEA 2	LTRE1HVBLT49	621	(-)	CCGAAA	S000250	low temperature
LEA 2	LTRE1HVBLT49	232	(+)	CCGAAA	S000250	low temperature
LEA 2	LTRE1HVBLT49	216	(-)	CCGAAA	S000250	low temperature
LEA 2	LTRE1HVBLT49	338	(-)	CCGAAA	S000250	low temperature
LEA 2	LTRE1HVBLT49	474	(-)	CCGAAA	S000250	low temperature
LEA 2	LTRE1HVBLT49	66	(-)	CCGAAA	S000250	low temperature
LEA 2	LTRE1HVBLT49	119	(-)	CCGAAA	S000250	low temperature
LEA 2	LTRE1HVBLT49	491	(-)	CCGAAA	S000250	low temperature
LEA 2	LTRE1HVBLT49	623	(+)	CCGAAA	S000250	low temperature
LEA 2	LTRE1HVBLT49	207	(+)	CCGAAA	S000250	low temperature
LEA 2	LTRE1HVBLT49	780	(-)	CCGAAA	S000250	low temperature
LEA 2	LTRE1HVBLT49	461	(-)	CCGAAA	S000250	low temperature
LEA 2	LTRE1HVBLT49	309	(-)	CCGAAA	S000250	low temperature
LEA 2	LTRE1HVBLT49	318	(-)	CCGAAA	S000250	low temperature
LEA 2	LTRE1HVBLT49	214	(+)	CCGAAA	S000250	low temperature
LEA 2	LTRE1HVBLT49	474	(-)	CCGAAA	S000250	low temperature
LEA 2	LTRE1HVBLT49	528	(-)	CCGAAA	S000250	low temperature
LEA 2	LTRE1HVBLT49	555	(+)	CCGAAA	S000250	low temperature
LEA 2	LTRE1HVBLT49	35	(-)	CCGAAA	S000250	low temperature
LEA 2	LTRE1HVBLT49	116	(-)	CCGAAA	S000250	low temperature
LEA 2	LTRE1HVBLT49	298	(-)	CCGAAA	S000250	low temperature
LEA 2	LTRE1HVBLT49	67	(-)	CCGAAA	S000250	low temperature
LEA 2	LTRE1HVBLT49	12	(-)	CCGAAA	S000250	low temperature
LEA 2	LTRE1HVBLT49	121	(-)	CCGAAA	S000250	low temperature
LEA 2	LTRE1HVBLT49	238	(-)	CCGAAA	S000250	low temperature
LEA 2	LTRE1HVBLT49	373	(-)	CCGAAA	S000250	low temperature
LEA 2	LTRE1HVBLT49	317	(-)	CCGAAA	S000250	low temperature
LEA 2	LTRE1HVBLT49	461	(-)	CCGAAA	S000250	low temperature
LEA 2	LTRE1HVBLT49	318	(-)	CCGAAA	S000250	low temperature
LEA 2	LTRE1HVBLT49	309	(-)	CCGAAA	S000250	low temperature
LEA 2	LTRE1HVBLT49	387	(-)	CCGAAA	S000250	low temperature
LEA 2	LTRE1HVBLT49	780	(-)	CCGAAA	S000250	low temperature
LEA 2	LTRE1HVBLT49	621	(-)	CCGAAA	S000250	low temperature
LEA 2	LTREATLTI78	552	(-)	ACCGACA	S000157	low temperature
LEA 2	LTREATLTI78	2	(-)	ACCGACA	S000157	low temperature
LEA 2	LTREATLTI78	2	(-)	ACCGACA	S000157	low temperature
LEA 2	LTREATLTI78	564	(-)	ACCGACA	S000157	low temperature
LEA 2	LTREATLTI78	312	(+)	ACCGACA	S000157	low temperature
LEA 2	LTREATLTI78	181	(+)	ACCGACA	S000157	low temperature
LEA 2	LTREATLTI78	564	(-)	ACCGACA	S000157	low temperature
LEA 2	LTRECOREATCOR15	3	(-)	CCGAC	S000153	necessary for cold- or drought
LEA 2	LTRECOREATCOR15	330	(+)	CCGAC	S000153	necessary for cold- or drought
LEA 2	LTRECOREATCOR15	361	(-)	CCGAC	S000153	necessary for cold- or drought
LEA 2	LTRECOREATCOR15	3	(-)	CCGAC	S000153	necessary for cold- or drought
LEA 2	LTRECOREATCOR15	78	(-)	CCGAC	S000153	necessary for cold- or drought
LEA 2	LTRECOREATCOR15	314	(+)	CCGAC	S000153	necessary for cold- or drought
LEA 2	LTRECOREATCOR15	655	(-)	CCGAC	S000153	necessary for cold- or drought
LEA 2	LTRECOREATCOR15	217	(+)	CCGAC	S000153	necessary for cold- or drought
LEA 2	LTRECOREATCOR15	3	(-)	CCGAC	S000153	necessary for cold- or drought
LEA 2	LTRECOREATCOR15	449	(-)	CCGAC	S000153	necessary for cold- or drought
LEA 2	LTRECOREATCOR15	585	(-)	CCGAC	S000153	necessary for cold- or drought
LEA 2	LTRECOREATCOR15	228	(+)	CCGAC	S000153	necessary for cold- or drought
LEA 2	LTRECOREATCOR15	239	(-)	CCGAC	S000153	necessary for cold- or drought
LEA 2	LTRECOREATCOR15	40	(-)	CCGAC	S000153	necessary for cold- or drought
LEA 2	LTRECOREATCOR15	52	(-)	CCGAC	S000153	necessary for cold- or drought
LEA 2	LTRECOREATCOR15	325	(+)	CCGAC	S000153	necessary for cold- or drought
LEA 2	LTRECOREATCOR15	175	(-)	CCGAC	S000153	necessary for cold- or drought
LEA 2	MYB1AT	503	(-)	WAACCA	S000408	MYB recognition site
LEA 2	MYB1AT	158	(+)	WAACCA	S000408	MYB recognition site
LEA 2	MYB1AT	293	(+)	WAACCA	S000408	MYB recognition site
LEA 2	MYB1AT	194	(+)	WAACCA	S000408	MYB recognition site
LEA 2	MYB1AT	131	(+)	WAACCA	S000408	MYB recognition site
LEA 2	MYB1AT	296	(+)	WAACCA	S000408	MYB recognition site
LEA 2	MYB1AT	136	(-)	WAACCA	S000408	MYB recognition site
LEA 2	MYB1AT	231	(+)	WAACCA	S000408	MYB recognition site
LEA 2	MYB1AT	299	(+)	WAACCA	S000408	MYB recognition site
LEA 2	MYB1AT	15	(+)	WAACCA	S000408	MYB recognition site
LEA 2	MYB1AT	208	(+)	WAACCA	S000408	MYB recognition site
LEA 2	MYB1AT	452	(-)	WAACCA	S000408	MYB recognition site
LEA 2	MYB1AT	123	(+)	WAACCA	S000408	MYB recognition site
LEA 2	MYB1AT	503	(-)	WAACCA	S000408	MYB recognition site
LEA 2	MYB1AT	744	(-)	WAACCA	S000408	MYB recognition site
LEA 2	MYB1AT	34	(+)	WAACCA	S000408	MYB recognition site
LEA 2	MYB1AT	139	(-)	WAACCA	S000408	MYB recognition site
LEA 2	MYB1AT	269	(+)	WAACCA	S000408	MYB recognition site
LEA 2	MYB1AT	1481	(+)	WAACCA	S000408	MYB recognition site
LEA 2	MYB1AT	54	(+)	WAACCA	S000408	MYB recognition site
LEA 2	MYB1AT	437	(-)	WAACCA	S000408	MYB recognition site
LEA 2	MYB1AT	868	(-)	WAACCA	S000408	MYB recognition site
LEA 2	MYB1AT	161	(-)	WAACCA	S000408	MYB recognition site
LEA 2	MYB1AT	453	(-)	WAACCA	S000408	MYB recognition site
LEA 2	MYB1AT	136	(-)	WAACCA	S000408	MYB recognition site
LEA 2	MYB1AT	208	(-)	WAACCA	S000408	MYB recognition site
LEA 2	MYB1AT	308	(+)	WAACCA	S000408	MYB recognition site
LEA 2	MYB1AT	8	(+)	WAACCA	S000408	MYB recognition site
LEA 2	MYB1AT	299	(+)	WAACCA	S000408	MYB recognition site
LEA 2	MYB1AT	216	(+)	WAACCA	S000408	MYB recognition site
LEA 2	MYB1AT	574	(-)	WAACCA	S000408	MYB recognition site
LEA 2	MYB1AT	264	(+)	WAACCA	S000408	MYB recognition site
LEA 2	MYB1AT	792	(-)	WAACCA	S000408	MYB recognition site
LEA 2	MYB1AT	1051	(-)	WAACCA	S000408	MYB recognition site
LEA 2	MYB1AT	158	(+)	WAACCA	S000408	MYB recognition site
LEA 2	MYB1AT	293	(+)	WAACCA	S000408	MYB recognition site
LEA 2	MYB1AT	146	(+)	WAACCA	S000408	MYB recognition site
LEA 2	MYB1AT	581	(-)	WAACCA	S000408	MYB recognition site
LEA 2	MYB1AT	145	(-)	WAACCA	S000408	MYB recognition site
LEA 2	MYB1AT	103	(+)	WAACCA	S000408	MYB recognition site
LEA 2	MYB1AT	54	(+)	WAACCA	S000408	MYB recognition site
LEA 2	MYB1AT	437	(-)	WAACCA	S000408	MYB recognition site
LEA 2	MYB1AT	517	(-)	WAACCA	S000408	MYB recognition site
LEA 2	MYB1AT	214	(-)	WAACCA	S000408	MYB recognition site
LEA 2	MYB1AT	373	(-)	WAACCA	S000408	MYB recognition site
LEA 2	MYB1AT	136	(-)	WAACCA	S000408	MYB recognition site
LEA 2	MYB1AT	208	(-)	WAACCA	S000408	MYB recognition site
LEA 2	MYB1AT	161	(-)	WAACCA	S000408	MYB recognition site
LEA 2	MYB1AT	453	(-)	WAACCA	S000408	MYB recognition site
LEA 2	MYB1AT	541	(+)	WAACCA	S000408	MYB recognition site
LEA 2	MYB1AT	2	(-)	WAACCA	S000408	MYB recognition site
LEA 2	MYB1AT	35	(-)	WAACCA	S000408	MYB recognition site
LEA 2	MYB1AT	159	(-)	WAACCA	S000408	MYB recognition site
LEA 2	MYB1AT	54	(+)	WAACCA	S000408	MYB recognition site
LEA 2	MYB1AT	437	(-)	WAACCA	S000408	MYB recognition site
LEA 2	MYBAT	525	(-)	TAACTG	S000177	MYB recognition site
LEA 2	MYBAT	700	(+)	TAACTG	S000177	MYB recognition site
LEA 2	MYBAT	294	(-)	TAACTG	S000177	MYB recognition site
LEA 2	MYBAT	332	(+)	TAACTG	S000177	MYB recognition site
LEA 2	MYBAT	733	(+)	TAACTG	S000177	MYB recognition site
LEA 2	MYBAT	13	(-)	TAACTG	S000177	MYB recognition site
LEA 2	MYBAT	525	(-)	TAACTG	S000177	MYB recognition site
LEA 2	MYBCORE	680	(+)	CNGTTR	S000176	Dehydratio/water stress
LEA 2	MYBCORE	292	(+)	CNGTTR	S000176	Dehydratio/water stress
LEA 2	MYBCORE	412	(-)	CNGTTR	S000176	Dehydratio/water stress
LEA 2	MYBCORE	301	(+)	CNGTTR	S000176	Dehydratio/water stress
LEA 2	MYBCORE	339	(-)	CNGTTR	S000176	Dehydratio/water stress
LEA 2	MYBCORE	617	(-)	CNGTTR	S000176	Dehydratio/water stress
LEA 2	MYBCORE	64	(+)	CNGTTR	S000176	Dehydratio/water stress
LEA 2	MYBCORE	572	(-)	CNGTTR	S000176	Dehydratio/water stress
LEA 2	MYBCORE	598	(+)	CNGTTR	S000176	Dehydratio/water stress
LEA 2	MYBCORE	484	(+)	CNGTTR	S000176	Dehydratio/water stress
LEA 2	MYBCORE	513	(-)	CNGTTR	S000176	Dehydratio/water stress
LEA 2	MYBCORE	601	(+)	CNGTTR	S000176	Dehydratio/water stress
LEA 2	MYBCORE	323	(+)	CNGTTR	S000176	Dehydratio/water stress
LEA 2	MYBCORE	329	(+)	CNGTTR	S000176	Dehydratio/water stress
LEA 2	MYBCORE	724	(+)	CNGTTR	S000176	Dehydratio/water stress
LEA 2	MYBCORE	113	(+)	CNGTTR	S000176	Dehydratio/water stress
LEA 2	MYBCORE	330	(-)	CNGTTR	S000176	Dehydratio/water stress
LEA 2	MYBCORE	514	(+)	CNGTTR	S000176	Dehydratio/water stress
LEA 2	MYBCORE	313	(-)	CNGTTR	S000176	Dehydratio/water stress
LEA 2	MYBCORE	513	(+)	CNGTTR	S000176	Dehydratio/water stress
LEA 2	MYBCORE	522	(+)	CNGTTR	S000176	Dehydratio/water stress
LEA 2	MYBCORE	669	(+)	CNGTTR	S000176	Dehydratio/water stress
LEA 2	MYBCORE	727	(-)	CNGTTR	S000176	Dehydratio/water stress
LEA 2	MYBCORE	577	(-)	CNGTTR	S000176	Dehydratio/water stress
LEA 2	MYBCORE	840	(+)	CNGTTR	S000176	Dehydratio/water stress
LEA 2	MYBCORE	856	(+)	CNGTTR	S000176	Dehydratio/water stress
LEA 2	MYBCORE	268	(-)	CNGTTR	S000176	Dehydratio/water stress
LEA 2	MYBCORE	445	(+)	CNGTTR	S000176	Dehydratio/water stress
LEA 2	MYBCORE	526	(+)	CNGTTR	S000176	Dehydratio/water stress
LEA 2	MYBCORE	124	(+)	CNGTTR	S000176	Dehydratio/water stress
LEA 2	MYBCORE	225	(+)	CNGTTR	S000176	Dehydratio/water stress
LEA 2	MYBCORE	301	(+)	CNGTTR	S000176	Dehydratio/water stress
LEA 2	MYBCORE	634	(-)	CNGTTR	S000176	Dehydratio/water stress
LEA 2	MYBCORE	529	(-)	CNGTTR	S000176	Dehydratio/water stress
LEA 2	MYBCORE	129	(-)	CNGTTR	S000176	Dehydratio/water stress
LEA 2	MYBCORE	162	(+)	CNGTTR	S000176	Dehydratio/water stress
LEA 2	MYBCORE	180	(+)	CNGTTR	S000176	Dehydratio/water stress
LEA 2	MYBCORE	535	(-)	CNGTTR	S000176	Dehydratio/water stress
LEA 2	MYBCORE	220	(-)	CNGTTR	S000176	Dehydratio/water stress
LEA 2	MYBCORE	343	(+)	CNGTTR	S000176	Dehydratio/water stress
LEA 2	MYBCORE	384	(+)	CNGTTR	S000176	Dehydratio/water stress
LEA 2	MYBCORE	567	(+)	CNGTTR	S000176	Dehydratio/water stress
LEA 2	MYBCORE	93	(+)	CNGTTR	S000176	Dehydratio/water stress
LEA 2	MYBCORE	211	(-)	CNGTTR	S000176	Dehydratio/water stress
LEA 2	MYBCORE	846	(-)	CNGTTR	S000176	Dehydratio/water stress
LEA 2	MYBCORE	984	(-)	CNGTTR	S000176	Dehydratio/water stress
LEA 2	MYBCORE	1052	(-)	CNGTTR	S000176	Dehydratio/water stress
LEA 2	MYBCORE	1161	(+)	CNGTTR	S000176	Dehydratio/water stress
LEA 2	MYBCORE	1315	(+)	CNGTTR	S000176	Dehydratio/water stress
LEA 2	MYBCORE	1354	(-)	CNGTTR	S000176	Dehydratio/water stress
LEA 2	MYBCORE	386	(+)	CNGTTR	S000176	Dehydratio/water stress
LEA 2	MYBCORE	568	(+)	CNGTTR	S000176	Dehydratio/water stress
LEA 2	MYBCORE	595	(-)	CNGTTR	S000176	Dehydratio/water stress
LEA 2	MYBCORE	175	(+)	CNGTTR	S000176	Dehydratio/water stress
LEA 2	MYBCORE	430	(+)	CNGTTR	S000176	Dehydratio/water stress
LEA 2	MYBCORE	311	(+)	CNGTTR	S000176	Dehydratio/water stress
LEA 2	MYBCORE	615	(+)	CNGTTR	S000176	Dehydratio/water stress
LEA 2	MYBCORE	629	(+)	CNGTTR	S000176	Dehydratio/water stress
LEA 2	MYBCORE	362	(-)	CNGTTR	S000176	Dehydratio/water stress
LEA 2	MYBCORE	415	(-)	CNGTTR	S000176	Dehydratio/water stress
LEA 2	MYBCORE	219	(+)	CNGTTR	S000176	Dehydratio/water stress
LEA 2	MYBCORE	232	(-)	CNGTTR	S000176	Dehydratio/water stress
LEA 2	MYBCORE	389	(-)	CNGTTR	S000176	Dehydratio/water stress
LEA 2	MYBCORE	470	(+)	CNGTTR	S000176	Dehydratio/water stress
LEA 2	MYBCORE	626	(+)	CNGTTR	S000176	Dehydratio/water stress
LEA 2	MYBCORE	136	(-)	CNGTTR	S000176	Dehydratio/water stress
LEA 2	MYBCORE	167	(-)	CNGTTR	S000176	Dehydratio/water stress
LEA 2	MYBCORE	409	(-)	CNGTTR	S000176	Dehydratio/water stress
LEA 2	MYBCORE	301	(+)	CNGTTR	S000176	Dehydratio/water stress
LEA 2	MYBCORE	339	(-)	CNGTTR	S000176	Dehydratio/water stress
LEA 2	MYBCORE	617	(-)	CNGTTR	S000176	Dehydratio/water stress
LEA 2	MYBCORE	292	(+)	CNGTTR	S000176	Dehydratio/water stress
LEA 2	MYBCORE	412	(-)	CNGTTR	S000176	Dehydratio/water stress
LEA 2	MYBCORE	39	(+)	CNGTTR	S000176	Dehydratio/water stress
LEA 2	MYBCORE	78	(+)	CNGTTR	S000176	Dehydratio/water stress
LEA 2	MYBCORE	188	(-)	CNGTTR	S000176	Dehydratio/water stress
LEA 2	MYBCORE	222	(+)	CNGTTR	S000176	Dehydratio/water stress
LEA 2	MYBCORE	453	(+)	CNGTTR	S000176	Dehydratio/water stress
LEA 2	MYBCORE	514	(+)	CNGTTR	S000176	Dehydratio/water stress
LEA 2	MYBCORE	185	(-)	CNGTTR	S000176	Dehydratio/water stress
LEA 2	MYBCORE	483	(-)	CNGTTR	S000176	Dehydratio/water stress
LEA 2	MYBCORE	70	(-)	CNGTTR	S000176	Dehydratio/water stress
LEA 2	MYBCORE	372	(+)	CNGTTR	S000176	Dehydratio/water stress
LEA 2	MYBCORE	344	(-)	CNGTTR	S000176	Dehydratio/water stress
LEA 2	MYBCORE	399	(-)	CNGTTR	S000176	Dehydratio/water stress
LEA 2	MYBCORE	232	(-)	CNGTTR	S000176	Dehydratio/water stress
LEA 2	MYBCORE	386	(+)	CNGTTR	S000176	Dehydratio/water stress
LEA 2	MYBCORE	70	(-)	CNGTTR	S000176	Dehydratio/water stress
LEA 2	MYBCORE	372	(+)	CNGTTR	S000176	Dehydratio/water stress
LEA 2	MYBCORE	510	(-)	CNGTTR	S000176	Dehydratio/water stress
LEA 2	MYBCORE	740	(+)	CNGTTR	S000176	Dehydratio/water stress
LEA 2	MYBCORE	148	(+)	CNGTTR	S000176	Dehydratio/water stress
LEA 2	MYBCORE	282	(+)	CNGTTR	S000176	Dehydratio/water stress
LEA 2	MYBCORE	797	(-)	CNGTTR	S000176	Dehydratio/water stress
LEA 2	MYBCORE	386	(+)	CNGTTR	S000176	Dehydratio/water stress
LEA 2	MYBCORE	568	(+)	CNGTTR	S000176	Dehydratio/water stress
LEA 2	MYBCORE	595	(-)	CNGTTR	S000176	Dehydratio/water stress
LEA 2	MYBCORE	389	(+)	CNGTTR	S000176	Dehydratio/water stress
LEA 2	MYBCOREATCYCB1	62	(+)	AACGG	S000502	Dehydratio/water stress
LEA 2	MYBCOREATCYCB1	502	(+)	AACGG	S000502	Dehydratio/water stress
LEA 2	MYBCOREATCYCB1	348	(-)	AACGG	S000502	Dehydratio/water stress
LEA 2	MYBCOREATCYCB1	388	(+)	AACGG	S000502	Dehydratio/water stress
LEA 2	MYBCOREATCYCB1	588	(-)	AACGG	S000502	Dehydratio/water stress
LEA 2	MYBCOREATCYCB1	606	(+)	AACGG	S000502	Dehydratio/water stress
LEA 2	MYBCOREATCYCB1	626	(-)	AACGG	S000502	Dehydratio/water stress
LEA 2	MYBCOREATCYCB1	215	(+)	AACGG	S000502	Dehydratio/water stress
LEA 2	MYBCOREATCYCB1	207	(-)	AACGG	S000502	Dehydratio/water stress
LEA 2	MYBCOREATCYCB1	352	(+)	AACGG	S000502	Dehydratio/water stress
LEA 2	MYBCOREATCYCB1	647	(-)	AACGG	S000502	Dehydratio/water stress
LEA 2	MYBCOREATCYCB1	106	(-)	AACGG	S000502	Dehydratio/water stress
LEA 2	MYBCOREATCYCB1	542	(-)	AACGG	S000502	Dehydratio/water stress
LEA 2	MYBCOREATCYCB1	191	(+)	AACGG	S000502	Dehydratio/water stress
LEA 2	MYBCOREATCYCB1	461	(-)	AACGG	S000502	Dehydratio/water stress
LEA 2	MYBCOREATCYCB1	496	(+)	AACGG	S000502	Dehydratio/water stress
LEA 2	MYBCOREATCYCB1	634	(-)	AACGG	S000502	Dehydratio/water stress
LEA 2	MYBCOREATCYCB1	702	(-)	AACGG	S000502	Dehydratio/water stress
LEA 2	MYBCOREATCYCB1	725	(+)	AACGG	S000502	Dehydratio/water stress
LEA 2	MYBCOREATCYCB1	740	(+)	AACGG	S000502	Dehydratio/water stress
LEA 2	MYBCOREATCYCB1	410	(+)	AACGG	S000502	Dehydratio/water stress
LEA 2	MYBCOREATCYCB1	538	(-)	AACGG	S000502	Dehydratio/water stress
LEA 2	MYBCOREATCYCB1	71	(+)	AACGG	S000502	Dehydratio/water stress
LEA 2	MYBCOREATCYCB1	95	(+)	AACGG	S000502	Dehydratio/water stress
LEA 2	MYBCOREATCYCB1	262	(-)	AACGG	S000502	Dehydratio/water stress
LEA 2	MYBCOREATCYCB1	476	(-)	AACGG	S000502	Dehydratio/water stress
LEA 2	MYBCOREATCYCB1	571	(-)	AACGG	S000502	Dehydratio/water stress
LEA 2	MYBCOREATCYCB1	242	(+)	AACGG	S000502	Dehydratio/water stress
LEA 2	MYBCOREATCYCB1	6	(-)	AACGG	S000502	Dehydratio/water stress
LEA 2	MYBCOREATCYCB1	119	(-)	AACGG	S000502	Dehydratio/water stress
LEA 2	MYBCOREATCYCB1	435	(-)	AACGG	S000502	Dehydratio/water stress
LEA 2	MYBCOREATCYCB1	526	(-)	AACGG	S000502	Dehydratio/water stress
LEA 2	MYBCOREATCYCB1	392	(+)	AACGG	S000502	Dehydratio/water stress
LEA 2	MYBCOREATCYCB1	392	(+)	AACGG	S000502	Dehydratio/water stress
LEA 2	MYBCOREATCYCB1	35	(+)	AACGG	S000502	Dehydratio/water stress
LEA 2	MYBCOREATCYCB1	313	(+)	AACGG	S000502	Dehydratio/water stress
LEA 2	MYBCOREATCYCB1	135	(-)	AACGG	S000502	Dehydratio/water stress
LEA 2	MYBCOREATCYCB1	414	(+)	AACGG	S000502	Dehydratio/water stress
LEA 2	MYBCOREATCYCB1	424	(-)	AACGG	S000502	Dehydratio/water stress
LEA 2	MYBCOREATCYCB1	519	(-)	AACGG	S000502	Dehydratio/water stress
LEA 2	MYBCOREATCYCB1	191	(+)	AACGG	S000502	Dehydratio/water stress
LEA 2	MYBCOREATCYCB1	461	(-)	AACGG	S000502	Dehydratio/water stress
LEA 2	MYBCOREATCYCB1	496	(+)	AACGG	S000502	Dehydratio/water stress
LEA 2	MYBCOREATCYCB1	634	(-)	AACGG	S000502	Dehydratio/water stress
LEA 2	MYBCOREATCYCB1	702	(-)	AACGG	S000502	Dehydratio/water stress
LEA 2	MYBCOREATCYCB1	725	(+)	AACGG	S000502	Dehydratio/water stress
LEA 2	MYBCOREATCYCB1	740	(+)	AACGG	S000502	Dehydratio/water stress
LEA 2	MYBCOREATCYCB1	62	(+)	AACGG	S000502	Dehydratio/water stress
LEA 2	MYBCOREATCYCB1	108	(+)	AACGG	S000502	Dehydratio/water stress
LEA 2	MYBCOREATCYCB1	512	(+)	AACGG	S000502	Dehydratio/water stress
LEA 2	MYBCOREATCYCB1	652	(-)	AACGG	S000502	Dehydratio/water stress
LEA 2	MYBCOREATCYCB1	582	(+)	AACGG	S000502	Dehydratio/water stress
LEA 2	MYBCOREATCYCB1	600	(-)	AACGG	S000502	Dehydratio/water stress
LEA 2	MYBCOREATCYCB1	119	(+)	AACGG	S000502	Dehydratio/water stress
LEA 2	MYBCOREATCYCB1	573	(+)	AACGG	S000502	Dehydratio/water stress
LEA 2	MYBCOREATCYCB1	173	(-)	AACGG	S000502	Dehydratio/water stress
LEA 2	MYBCOREATCYCB1	401	(-)	AACGG	S000502	Dehydratio/water stress
LEA 2	MYBCOREATCYCB1	515	(+)	AACGG	S000502	Dehydratio/water stress
LEA 2	MYBCOREATCYCB1	105	(-)	AACGG	S000502	Dehydratio/water stress
LEA 2	MYBCOREATCYCB1	218	(+)	AACGG	S000502	Dehydratio/water stress
LEA 2	MYBCOREATCYCB1	88	(+)	AACGG	S000502	Dehydratio/water stress
LEA 2	MYBCOREATCYCB1	269	(+)	AACGG	S000502	Dehydratio/water stress
LEA 2	MYBCOREATCYCB1	174	(-)	AACGG	S000502	Dehydratio/water stress
LEA 2	MYBCOREATCYCB1	243	(-)	AACGG	S000502	Dehydratio/water stress
LEA 2	MYBCOREATCYCB1	542	(+)	AACGG	S000502	Dehydratio/water stress
LEA 2	MYBCOREATCYCB1	655	(+)	AACGG	S000502	Dehydratio/water stress
LEA 2	MYBCOREATCYCB1	567	(+)	AACGG	S000502	Dehydratio/water stress
LEA 2	MYBCOREATCYCB1	371	(+)	AACGG	S000502	Dehydratio/water stress
LEA 2	MYBCOREATCYCB1	666	(-)	AACGG	S000502	Dehydratio/water stress
LEA 2	MYBCOREATCYCB1	383	(+)	AACGG	S000502	Dehydratio/water stress
LEA 2	MYBCOREATCYCB1	573	(+)	AACGG	S000502	Dehydratio/water stress
LEA 2	MYBCOREATCYCB1	119	(-)	AACGG	S000502	Dehydratio/water stress
LEA 2	MYBCOREATCYCB1	36	(+)	AACGG	S000502	Dehydratio/water stress
LEA 2	MYBCOREATCYCB1	62	(+)	AACGG	S000502	Dehydratio/water stress
LEA 2	MYBCOREATCYCB1	108	(+)	AACGG	S000502	Dehydratio/water stress
LEA 2	MYBCOREATCYCB1	512	(+)	AACGG	S000502	Dehydratio/water stress
LEA 2	MYBCOREATCYCB1	652	(-)	AACGG	S000502	Dehydratio/water stress
LEA 2	MYBCOREATCYCB1	292	(+)	AACGG	S000502	Dehydratio/water stress
LEA 2	MYBCOREATCYCB1	491	(-)	AACGG	S000502	Dehydratio/water stress
LEA 2	MYBCOREATCYCB1	25	(-)	AACGG	S000502	Dehydratio/water stress
LEA 2	MYBCOREATCYCB1	300	(-)	AACGG	S000502	Dehydratio/water stress
LEA 2	MYBCOREATCYCB1	174	(-)	AACGG	S000502	Dehydratio/water stress
LEA 2	MYBCOREATCYCB1	243	(-)	AACGG	S000502	Dehydratio/water stress
LEA 2	MYBCOREATCYCB1	542	(+)	AACGG	S000502	Dehydratio/water stress
LEA 2	MYBCOREATCYCB1	371	(+)	AACGG	S000502	Dehydratio/water stress
LEA 2	MYBCOREATCYCB1	666	(-)	AACGG	S000502	Dehydratio/water stress
LEA 2	MYBCOREATCYCB1	162	(-)	AACGG	S000502	Dehydratio/water stress
LEA 2	MYBCOREATCYCB1	36	(+)	AACGG	S000502	Dehydratio/water stress
LEA 2	MYBAT	376	(-)	TAACTG	S000177	MYB recognition site
LEA 2	MYBAT	134	(+)	TAACTG	S000177	MYB recognition site
LEA 2	MYBAT	466	(-)	TAACTG	S000177	MYB recognition site
LEA 2	MYBAT	35	(-)	TAACTG	S000177	MYB recognition site
LEA 2	MYBAT	629	(-)	TAACTG	S000177	MYB recognition site
LEA 2	MYBAT	737	(+)	TAACTG	S000177	MYB recognition site
LEA 2	MYBCOREATCYCB1	618	(-)	AACGG	S000502	Dehydratio/water stress
LEA 2	MYBCOREATCYCB1	119	(-)	AACGG	S000502	Dehydratio/water stress
LEA 2	MYBCOREATCYCB1	119	(+)	AACGG	S000502	Dehydratio/water stress
LEA 2	MYBCOREATCYCB1	573	(+)	AACGG	S000502	Dehydratio/water stress
LEA 2	MYBCOREATCYCB1	173	(-)	AACGG	S000502	Dehydratio/water stress
LEA 2	MYBCOREATCYCB1	401	(-)	AACGG	S000502	Dehydratio/water stress
LEA 2	MYBCOREATCYCB1	292	(+)	AACGG	S000502	Dehydratio/water stress
LEA 2	MYBCOREATCYCB1	491	(-)	AACGG	S000502	Dehydratio/water stress
LEA 2	MYBCOREATCYCB1	112	(-)	AACGG	S000502	Dehydratio/water stress
LEA 2	MYBCOREATCYCB1	219	(-)	AACGG	S000502	Dehydratio/water stress
LEA 2	MYBCOREATCYCB1	488	(-)	AACGG	S000502	Dehydratio/water stress
LEA 2	MYBCOREATCYCB1	589	(-)	AACGG	S000502	Dehydratio/water stress
LEA 2	MYBCOREATCYCB1	324	(+)	AACGG	S000502	Dehydratio/water stress
LEA 2	MYBCOREATCYCB1	69	(-)	AACGG	S000502	Dehydratio/water stress
LEA 2	MYBCOREATCYCB1	597	(-)	AACGG	S000502	Dehydratio/water stress
LEA 2	MYBCOREATCYCB1	383	(+)	AACGG	S000502	Dehydratio/water stress
LEA 2	MYBCOREATCYCB1	573	(+)	AACGG	S000502	Dehydratio/water stress
LEA 2	MYBCOREATCYCB1	689	(+)	AACGG	S000502	Dehydratio/water stress
LEA 2	MYBCOREATCYCB1	414	(+)	AACGG	S000502	Dehydratio/water stress
LEA 2	MYBCOREATCYCB1	184	(-)	AACGG	S000502	Dehydratio/water stress
LEA 2	MYBCOREATCYCB1	680	(+)	AACGG	S000502	Dehydratio/water stress
LEA 2	MYBCOREATCYCB1	221	(+)	AACGG	S000502	Dehydratio/water stress
LEA 2	ABRERATCAL	433	(-)	MACGYGB	S000507	ABA responsive complex
LEA 2	ABRERATCAL	597	(+)	MACGYGB	S000507	ABA responsive complex
LEA 2	ABRERATCAL	400	(-)	MACGYGB	S000507	ABA responsive complex
LEA 2	ABRERATCAL	153	(-)	MACGYGB	S000507	ABA responsive complex
LEA 2	ABRERATCAL	154	(+)	MACGYGB	S000507	ABA responsive complex
LEA 2	ABRERATCAL	471	(-)	MACGYGB	S000507	ABA responsive complex
LEA 2	ABRERATCAL	472	(+)	MACGYGB	S000507	ABA responsive complex
LEA 2	ABRERATCAL	557	(+)	MACGYGB	S000507	ABA responsive complex
LEA 2	ABRERATCAL	400	(-)	MACGYGB	S000507	ABA responsive complex
LEA 2	ABRERATCAL	96	(+)	MACGYGB	S000507	ABA responsive complex
LEA 2	ABRERATCAL	710	(+)	MACGYGB	S000507	ABA responsive complex
LEA 2	ABRERATCAL	251	(+)	MACGYGB	S000507	ABA responsive complex
LEA 2	ABRERATCAL	96	(+)	MACGYGB	S000507	ABA responsive complex
LEA 2	ABRERATCAL	557	(+)	MACGYGB	S000507	ABA responsive complex
LEA 2	ABRERATCAL	54	(-)	MACGYGB	S000507	ABA responsive complex
LEA 2	ABRERATCAL	380	(+)	MACGYGB	S000507	ABA responsive complex
LEA 2	ABRERATCAL	492	(-)	MACGYGB	S000507	ABA responsive complex
LEA 2	ABRERATCAL	493	(+)	MACGYGB	S000507	ABA responsive complex
LEA 2	ABRERATCAL	416	(-)	MACGYGB	S000507	ABA responsive complex
LEA 2	ABRERATCAL	437	(-)	MACGYGB	S000507	ABA responsive complex
LEA 2	ABRERATCAL	565	(+)	MACGYGB	S000507	ABA responsive complex
LEA 2	ABRERATCAL	566	(-)	MACGYGB	S000507	ABA responsive complex
LEA 2	ABRERATCAL	54	(-)	MACGYGB	S000507	ABA responsive complex
LEA 2	ABRERATCAL	492	(-)	MACGYGB	S000507	ABA responsive complex
LEA 2	ABRERATCAL	493	(+)	MACGYGB	S000507	ABA responsive complex
LEA 2	ABRERATCAL	96	(+)	MACGYGB	S000507	ABA responsive complex
LEA 2	ABRERATCAL	914	(+)	MACGYGB	S000507	ABA responsive complex
LEA 2	ABRERATCAL	312	(-)	MACGYGB	S000507	ABA responsive complex
LEA 2	ABRERATCAL	370	(+)	MACGYGB	S000507	ABA responsive complex
LEA 2	ABRERATCAL	149	(+)	MACGYGB	S000507	ABA responsive complex
LEA 2	ABRERATCAL	334	(+)	MACGYGB	S000507	ABA responsive complex
LEA 2	ABRERATCAL	596	(-)	MACGYGB	S000507	ABA responsive complex
LEA 2	ABRERATCAL	96	(+)	MACGYGB	S000507	ABA responsive complex
LEA 2	ABREZMRAB8	471	(-)	CCACGTGG	S000133	ABA responsive complex
LEA 2	ABREZMRAB8	471	(+)	CCACGTGG	S000133	ABA responsive complex
LEA 2	ABREZMRAB8	471	(-)	CCACGTGG	S000133	ABA responsive complex
LEA 2	ABREZMRAB8	471	(+)	CCACGTGG	S000133	ABA responsive complex
LEA 2	ABREZMRAB8	492	(-)	CCACGTGG	S000133	ABA responsive complex
LEA 2	ABREZMRAB8	492	(+)	CCACGTGG	S000133	ABA responsive complex
LEA 2	ABREZMRAB8	492	(-)	CCACGTGG	S000133	ABA responsive complex
LEA 2	ABREZMRAB8	492	(+)	CCACGTGG	S000133	ABA responsive complex
LEA 2	ACGTABREMOTIFAOSEM	580	(+)	ACGTGKC	S000394	interdependent in the ABA-responsive expression of the rd29A
LEA 2	ACGTABREMOTIFAOSEM	381	(+)	ACGTGKC	S000394	interdependent in the ABA-responsive expression of the rd29A
LEA 2	ACGTABREMOTIFAOSEM	435	(+)	ACGTGKC	S000394	interdependent in the ABA-responsive expression of the rd29A
LEA 2	ACGTABREMOTIFAOSEM	436	(-)	ACGTGKC	S000394	interdependent in the ABA-responsive expression of the rd29A
LEA 2	ACGTABREMOTIFAOSEM	592	(+)	ACGTGKC	S000394	interdependent in the ABA-responsive expression of the rd29A
LEA 2	ACGTATERD1	111	(-)	ACGT	S000415	early responsive to dehydration
LEA 2	ACGTATERD1	111	(+)	ACGT	S000415	early responsive to dehydration
LEA 2	ACGTATERD1	283	(-)	ACGT	S000415	early responsive to dehydration
LEA 2	ACGTATERD1	283	(+)	ACGT	S000415	early responsive to dehydration
LEA 2	ACGTATERD1	81	(-)	ACGT	S000415	early responsive to dehydration
LEA 2	ACGTATERD1	81	(+)	ACGT	S000415	early responsive to dehydration
LEA 2	ACGTATERD1	850	(-)	ACGT	S000415	early responsive to dehydration
LEA 2	ACGTATERD1	850	(+)	ACGT	S000415	early responsive to dehydration
LEA 2	ACGTATERD1	435	(-)	ACGT	S000415	early responsive to dehydration
LEA 2	ACGTATERD1	435	(+)	ACGT	S000415	early responsive to dehydration
LEA 2	ACGTATERD1	698	(-)	ACGT	S000415	early responsive to dehydration
LEA 2	ACGTATERD1	698	(+)	ACGT	S000415	early responsive to dehydration
LEA 2	ACGTATERD1	903	(-)	ACGT	S000415	early responsive to dehydration
LEA 2	ACGTATERD1	903	(+)	ACGT	S000415	early responsive to dehydration
LEA 2	ACGTATERD1	1006	(-)	ACGT	S000415	early responsive to dehydration
LEA 2	ACGTATERD1	1006	(+)	ACGT	S000415	early responsive to dehydration
LEA 2	ACGTATERD1	288	(-)	ACGT	S000415	early responsive to dehydration
LEA 2	ACGTATERD1	288	(+)	ACGT	S000415	early responsive to dehydration
LEA 2	ACGTATERD1	161	(-)	ACGT	S000415	early responsive to dehydration
LEA 2	ACGTATERD1	161	(+)	ACGT	S000415	early responsive to dehydration
LEA 2	ACGTATERD1	295	(-)	ACGT	S000415	early responsive to dehydration
LEA 2	ACGTATERD1	295	(+)	ACGT	S000415	early responsive to dehydration
LEA 2	ACGTATERD1	317	(-)	ACGT	S000415	early responsive to dehydration
LEA 2	ACGTATERD1	317	(+)	ACGT	S000415	early responsive to dehydration
LEA 2	ACGTATERD1	249	(-)	ACGT	S000415	early responsive to dehydration
LEA 2	ACGTATERD1	249	(+)	ACGT	S000415	early responsive to dehydration
LEA 2	ACGTATERD1	280	(-)	ACGT	S000415	early responsive to dehydration
LEA 2	ACGTATERD1	280	(+)	ACGT	S000415	early responsive to dehydration
LEA 2	ACGTATERD1	365	(-)	ACGT	S000415	early responsive to dehydration
LEA 2	ACGTATERD1	365	(+)	ACGT	S000415	early responsive to dehydration
LEA 2	ACGTATERD1	527	(-)	ACGT	S000415	early responsive to dehydration
LEA 2	ACGTATERD1	527	(+)	ACGT	S000415	early responsive to dehydration
LEA 2	ACGTATERD1	580	(-)	ACGT	S000415	early responsive to dehydration
LEA 2	ACGTATERD1	580	(+)	ACGT	S000415	early responsive to dehydration
LEA 2	ACGTATERD1	234	(-)	ACGT	S000415	early responsive to dehydration
LEA 2	ACGTATERD1	234	(+)	ACGT	S000415	early responsive to dehydration
LEA 2	ACGTATERD1	319	(-)	ACGT	S000415	early responsive to dehydration
LEA 2	ACGTATERD1	319	(+)	ACGT	S000415	early responsive to dehydration
LEA 2	ACGTATERD1	341	(-)	ACGT	S000415	early responsive to dehydration
LEA 2	ACGTATERD1	341	(+)	ACGT	S000415	early responsive to dehydration
LEA 2	ACGTATERD1	372	(-)	ACGT	S000415	early responsive to dehydration
LEA 2	ACGTATERD1	372	(+)	ACGT	S000415	early responsive to dehydration
LEA 2	ACGTATERD1	409	(-)	ACGT	S000415	early responsive to dehydration
LEA 2	ACGTATERD1	409	(+)	ACGT	S000415	early responsive to dehydration
LEA 2	ACGTATERD1	414	(-)	ACGT	S000415	early responsive to dehydration
LEA 2	ACGTATERD1	414	(+)	ACGT	S000415	early responsive to dehydration
LEA 2	ACGTATERD1	430	(-)	ACGT	S000415	early responsive to dehydration
LEA 2	ACGTATERD1	430	(+)	ACGT	S000415	early responsive to dehydration
LEA 2	ACGTATERD1	500	(-)	ACGT	S000415	early responsive to dehydration
LEA 2	ACGTATERD1	500	(+)	ACGT	S000415	early responsive to dehydration
LEA 2	ACGTATERD1	112	(-)	ACGT	S000415	early responsive to dehydration
LEA 2	ACGTATERD1	112	(+)	ACGT	S000415	early responsive to dehydration
LEA 2	ACGTATERD1	365	(-)	ACGT	S000415	early responsive to dehydration
LEA 2	ACGTATERD1	365	(+)	ACGT	S000415	early responsive to dehydration
LEA 2	ACGTATERD1	396	(-)	ACGT	S000415	early responsive to dehydration
LEA 2	ACGTATERD1	396	(+)	ACGT	S000415	early responsive to dehydration
LEA 2	ACGTATERD1	534	(-)	ACGT	S000415	early responsive to dehydration
LEA 2	ACGTATERD1	534	(+)	ACGT	S000415	early responsive to dehydration
LEA 2	ACGTATERD1	539	(-)	ACGT	S000415	early responsive to dehydration
LEA 2	ACGTATERD1	539	(+)	ACGT	S000415	early responsive to dehydration
LEA 2	ACGTATERD1	689	(-)	ACGT	S000415	early responsive to dehydration
LEA 2	ACGTATERD1	689	(+)	ACGT	S000415	early responsive to dehydration
LEA 2	ACGTATERD1	452	(-)	ACGT	S000415	early responsive to dehydration
LEA 2	ACGTATERD1	452	(+)	ACGT	S000415	early responsive to dehydration
LEA 2	ACGTATERD1	552	(-)	ACGT	S000415	early responsive to dehydration
LEA 2	ACGTATERD1	552	(+)	ACGT	S000415	early responsive to dehydration
LEA 2	ACGTATERD1	552	(-)	ACGT	S000415	early responsive to dehydration
LEA 2	ACGTATERD1	552	(+)	ACGT	S000415	early responsive to dehydration
LEA 2	ACGTATERD1	666	(-)	ACGT	S000415	early responsive to dehydration
LEA 2	ACGTATERD1	666	(+)	ACGT	S000415	early responsive to dehydration
LEA 2	ACGTATERD1	81	(-)	ACGT	S000415	early responsive to dehydration
LEA 2	ACGTATERD1	81	(+)	ACGT	S000415	early responsive to dehydration
LEA 2	ACGTATERD1	97	(-)	ACGT	S000415	early responsive to dehydration
LEA 2	ACGTATERD1	97	(+)	ACGT	S000415	early responsive to dehydration
LEA 2	ACGTATERD1	129	(-)	ACGT	S000415	early responsive to dehydration
LEA 2	ACGTATERD1	129	(+)	ACGT	S000415	early responsive to dehydration
LEA 2	ACGTATERD1	14	(-)	ACGT	S000415	early responsive to dehydration
LEA 2	ACGTATERD1	14	(+)	ACGT	S000415	early responsive to dehydration
LEA 2	ACGTATERD1	47	(-)	ACGT	S000415	early responsive to dehydration
LEA 2	ACGTATERD1	47	(+)	ACGT	S000415	early responsive to dehydration
LEA 2	ACGTATERD1	135	(-)	ACGT	S000415	early responsive to dehydration
LEA 2	ACGTATERD1	135	(+)	ACGT	S000415	early responsive to dehydration
LEA 2	ACGTATERD1	206	(-)	ACGT	S000415	early responsive to dehydration
LEA 2	ACGTATERD1	206	(+)	ACGT	S000415	early responsive to dehydration
LEA 2	ACGTATERD1	213	(-)	ACGT	S000415	early responsive to dehydration
LEA 2	ACGTATERD1	213	(+)	ACGT	S000415	early responsive to dehydration
LEA 2	ACGTATERD1	463	(-)	ACGT	S000415	early responsive to dehydration
LEA 2	ACGTATERD1	463	(+)	ACGT	S000415	early responsive to dehydration
LEA 2	ACGTATERD1	244	(-)	ACGT	S000415	early responsive to dehydration
LEA 2	ACGTATERD1	244	(+)	ACGT	S000415	early responsive to dehydration
LEA 2	ACGTATERD1	331	(-)	ACGT	S000415	early responsive to dehydration
LEA 2	ACGTATERD1	331	(+)	ACGT	S000415	early responsive to dehydration
LEA 2	ACGTATERD1	490	(-)	ACGT	S000415	early responsive to dehydration
LEA 2	ACGTATERD1	490	(+)	ACGT	S000415	early responsive to dehydration
LEA 2	ACGTATERD1	505	(-)	ACGT	S000415	early responsive to dehydration
LEA 2	ACGTATERD1	505	(+)	ACGT	S000415	early responsive to dehydration
LEA 2	ACGTATERD1	588	(-)	ACGT	S000415	early responsive to dehydration
LEA 2	ACGTATERD1	588	(+)	ACGT	S000415	early responsive to dehydration
LEA 2	ACGTATERD1	616	(-)	ACGT	S000415	early responsive to dehydration
LEA 2	ACGTATERD1	616	(+)	ACGT	S000415	early responsive to dehydration
LEA 2	ACGTATERD1	243	(-)	ACGT	S000415	early responsive to dehydration
LEA 2	ACGTATERD1	243	(+)	ACGT	S000415	early responsive to dehydration
LEA 2	ACGTATERD1	91	(-)	ACGT	S000415	early responsive to dehydration
LEA 2	ACGTATERD1	91	(+)	ACGT	S000415	early responsive to dehydration
LEA 2	ACGTATERD1	526	(-)	ACGT	S000415	early responsive to dehydration
LEA 2	ACGTATERD1	526	(+)	ACGT	S000415	early responsive to dehydration
LEA 2	ACGTATERD1	161	(-)	ACGT	S000415	early responsive to dehydration
LEA 2	ACGTATERD1	161	(+)	ACGT	S000415	early responsive to dehydration
LEA 2	ACGTATERD1	24	(-)	ACGT	S000415	early responsive to dehydration
LEA 2	ACGTATERD1	24	(+)	ACGT	S000415	early responsive to dehydration
LEA 2	ACGTATERD1	112	(-)	ACGT	S000415	early responsive to dehydration
LEA 2	ACGTATERD1	112	(+)	ACGT	S000415	early responsive to dehydration
LEA 2	ACGTATERD1	365	(-)	ACGT	S000415	early responsive to dehydration
LEA 2	ACGTATERD1	365	(+)	ACGT	S000415	early responsive to dehydration
LEA 2	ACGTATERD1	396	(-)	ACGT	S000415	early responsive to dehydration
LEA 2	ACGTATERD1	396	(+)	ACGT	S000415	early responsive to dehydration
LEA 2	ACGTATERD1	539	(-)	ACGT	S000415	early responsive to dehydration
LEA 2	ACGTATERD1	539	(+)	ACGT	S000415	early responsive to dehydration
LEA 2	ACGTATERD1	689	(-)	ACGT	S000415	early responsive to dehydration
LEA 2	ACGTATERD1	689	(+)	ACGT	S000415	early responsive to dehydration
LEA 2	ACGTATERD1	231	(-)	ACGT	S000415	early responsive to dehydration
LEA 2	ACGTATERD1	231	(+)	ACGT	S000415	early responsive to dehydration
LEA 2	ACGTATERD1	295	(-)	ACGT	S000415	early responsive to dehydration
LEA 2	ACGTATERD1	295	(+)	ACGT	S000415	early responsive to dehydration
LEA 2	ACGTATERD1	338	(-)	ACGT	S000415	early responsive to dehydration
LEA 2	ACGTATERD1	338	(+)	ACGT	S000415	early responsive to dehydration
LEA 2	ACGTATERD1	207	(-)	ACGT	S000415	early responsive to dehydration
LEA 2	ACGTATERD1	207	(+)	ACGT	S000415	early responsive to dehydration
LEA 2	ACGTATERD1	292	(-)	ACGT	S000415	early responsive to dehydration
LEA 2	ACGTATERD1	292	(+)	ACGT	S000415	early responsive to dehydration
LEA 2	ACGTATERD1	732	(-)	ACGT	S000415	early responsive to dehydration
LEA 2	ACGTATERD1	732	(+)	ACGT	S000415	early responsive to dehydration
LEA 2	ACGTATERD1	639	(-)	ACGT	S000415	early responsive to dehydration
LEA 2	ACGTATERD1	639	(+)	ACGT	S000415	early responsive to dehydration
LEA 2	ACGTATERD1	115	(-)	ACGT	S000415	early responsive to dehydration
LEA 2	ACGTATERD1	115	(+)	ACGT	S000415	early responsive to dehydration
LEA 2	ACGTATERD1	280	(-)	ACGT	S000415	early responsive to dehydration
LEA 2	ACGTATERD1	280	(+)	ACGT	S000415	early responsive to dehydration
LEA 2	ACGTATERD1	337	(-)	ACGT	S000415	early responsive to dehydration
LEA 2	ACGTATERD1	337	(+)	ACGT	S000415	early responsive to dehydration
LEA 2	ACGTATERD1	363	(-)	ACGT	S000415	early responsive to dehydration
LEA 2	ACGTATERD1	363	(+)	ACGT	S000415	early responsive to dehydration
LEA 2	ACGTATERD1	531	(-)	ACGT	S000415	early responsive to dehydration
LEA 2	ACGTATERD1	531	(+)	ACGT	S000415	early responsive to dehydration
LEA 2	ACGTATERD1	231	(-)	ACGT	S000415	early responsive to dehydration
LEA 2	ACGTATERD1	231	(+)	ACGT	S000415	early responsive to dehydration
LEA 2	ACGTATERD1	392	(-)	ACGT	S000415	early responsive to dehydration
LEA 2	ACGTATERD1	392	(+)	ACGT	S000415	early responsive to dehydration
LEA 2	ACGTATERD1	658	(-)	ACGT	S000415	early responsive to dehydration
LEA 2	ACGTATERD1	658	(+)	ACGT	S000415	early responsive to dehydration
LEA 2	ACGTATERD1	9	(-)	ACGT	S000415	early responsive to dehydration
LEA 2	ACGTATERD1	9	(+)	ACGT	S000415	early responsive to dehydration
LEA 2	ACGTATERD1	95	(-)	ACGT	S000415	early responsive to dehydration
LEA 2	ACGTATERD1	95	(+)	ACGT	S000415	early responsive to dehydration
LEA 2	ACGTATERD1	362	(-)	ACGT	S000415	early responsive to dehydration
LEA 2	ACGTATERD1	362	(+)	ACGT	S000415	early responsive to dehydration
LEA 2	ACGTATERD1	568	(-)	ACGT	S000415	early responsive to dehydration
LEA 2	ACGTATERD1	568	(+)	ACGT	S000415	early responsive to dehydration
LEA 2	ACGTATERD1	194	(-)	ACGT	S000415	early responsive to dehydration
LEA 2	ACGTATERD1	194	(+)	ACGT	S000415	early responsive to dehydration
LEA 2	ACGTATERD1	200	(-)	ACGT	S000415	early responsive to dehydration
LEA 2	ACGTATERD1	200	(+)	ACGT	S000415	early responsive to dehydration
LEA 2	ACGTATERD1	89	(-)	ACGT	S000415	early responsive to dehydration
LEA 2	ACGTATERD1	89	(+)	ACGT	S000415	early responsive to dehydration
LEA 2	ACGTATERD1	159	(-)	ACGT	S000415	early responsive to dehydration
LEA 2	ACGTATERD1	159	(+)	ACGT	S000415	early responsive to dehydration
LEA 2	ACGTATERD1	109	(-)	ACGT	S000415	early responsive to dehydration
LEA 2	ACGTATERD1	109	(+)	ACGT	S000415	early responsive to dehydration
LEA 2	ACGTATERD1	589	(-)	ACGT	S000415	early responsive to dehydration
LEA 2	ACGTATERD1	589	(+)	ACGT	S000415	early responsive to dehydration
LEA 2	ACGTATERD1	35	(-)	ACGT	S000415	early responsive to dehydration
LEA 2	ACGTATERD1	35	(+)	ACGT	S000415	early responsive to dehydration
LEA 2	ACGTATERD1	84	(-)	ACGT	S000415	early responsive to dehydration
[truncated: 1,720 more rows]
